# Supplementary material for: Study protocol for a randomised clinical trial of a decision aid and values clarification method for parents of a fetus or neonate diagnosed with a life-threatening congenital heart defect
Source: PubMed Central journal article supplement — BMJ Open. 2021 Dec 10;11(12):e055455. doi: 10.1136/bmjopen-2021-055455 (PMC8666895; doi:10.1136/bmjopen-2021-055455), 2021-12-10
Supplement: bmjopen-2021-055455.draft_revisions.pdf [file bmjopen-2021-055455.draft_revisions.pdf]

# BMJ Open

BMJ Open is committed to open peer review. As part of this commitment we make the peer review history of every article we publish publicly available.

When an article is published we post the peer reviewers' comments and the authors' responses online. We also post the versions of the paper that were used during peer review. These are the versions that the peer review comments apply to.

The versions of the paper that follow are the versions that were submitted during the peer review process. They are not the versions of record or the final published versions. They should not be cited or distributed as the published version of this manuscript.

BMJ Open is an open access journal and the full, final, typeset and author-corrected version of record of the manuscript is available on our site with no access controls, subscription charges or pay-per-view fees (<http://bmjopen.bmj.com>).

If you have any questions on BMJ Open's open peer review process please email [info.bmjopen@bmj.com](mailto:info.bmjopen@bmj.com)

# BMJ Open

## A Randomized Clinical Trial of a Decision Aid and Values Clarification Method for Parents of a Fetus or Neonate Diagnosed with a Life-Threatening Congenital Heart Defect

|                               |                                                                                                                                                                                                                                                                                                                                                                                                                                                                                                                                                                                                                                                                                                                                                                                                    |
|-------------------------------|----------------------------------------------------------------------------------------------------------------------------------------------------------------------------------------------------------------------------------------------------------------------------------------------------------------------------------------------------------------------------------------------------------------------------------------------------------------------------------------------------------------------------------------------------------------------------------------------------------------------------------------------------------------------------------------------------------------------------------------------------------------------------------------------------|
| Journal:                      | <i>BMJ Open</i>                                                                                                                                                                                                                                                                                                                                                                                                                                                                                                                                                                                                                                                                                                                                                                                    |
| Manuscript ID                 | bmjopen-2021-055455                                                                                                                                                                                                                                                                                                                                                                                                                                                                                                                                                                                                                                                                                                                                                                                |
| Article Type:                 | Protocol                                                                                                                                                                                                                                                                                                                                                                                                                                                                                                                                                                                                                                                                                                                                                                                           |
| Date Submitted by the Author: | 12-Jul-2021                                                                                                                                                                                                                                                                                                                                                                                                                                                                                                                                                                                                                                                                                                                                                                                        |
| Complete List of Authors:     | <p>Delaney, Rebecca; The University of Utah School of Medicine<br/> Pinto, Nelangi; University of Utah, Division of Pediatric Cardiology<br/> Ozanne, Elissa; The University of Utah School of Medicine, Population Health Sciences<br/> Stark, Louisa; University of Utah School of Medicine, Human Genetics<br/> Pershing, Mandy; University of Utah School of Medicine, Population Health Sciences<br/> Thorpe, Alistair; University of Utah School of Medicine, Population Health Sciences<br/> Witteman, Holly; Faculté de médecine de l'Université Laval<br/> Thokala, Praveen; The University of Sheffield,<br/> Greene, Tom; The University of Utah School of Medicine, Population Health Sciences<br/> Fagerlin, A; University of Utah School of Medicine, Population Health Sciences</p> |
| Keywords:                     | Congenital heart disease < CARDIOLOGY, Paediatric cardiology < CARDIOLOGY, Paediatric cardiology < PAEDIATRICS                                                                                                                                                                                                                                                                                                                                                                                                                                                                                                                                                                                                                                                                                     |
|                               |                                                                                                                                                                                                                                                                                                                                                                                                                                                                                                                                                                                                                                                                                                                                                                                                    |

SCHOLARONE™  
Manuscripts

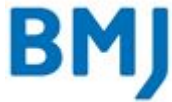

I, the Submitting Author has the right to grant and does grant on behalf of all authors of the Work (as defined in the below author licence), an exclusive licence and/or a non-exclusive licence for contributions from authors who are: i) UK Crown employees; ii) where BMJ has agreed a CC-BY licence shall apply, and/or iii) in accordance with the terms applicable for US Federal Government officers or employees acting as part of their official duties; on a worldwide, perpetual, irrevocable, royalty-free basis to BMJ Publishing Group Ltd ("BMJ") its licensees and where the relevant Journal is co-owned by BMJ to the co-owners of the Journal, to publish the Work in this journal and any other BMJ products and to exploit all rights, as set out in our [licence](#).

The Submitting Author accepts and understands that any supply made under these terms is made by BMJ to the Submitting Author unless you are acting as an employee on behalf of your employer or a postgraduate student of an affiliated institution which is paying any applicable article publishing charge ("APC") for Open Access articles. Where the Submitting Author wishes to make the Work available on an Open Access basis (and intends to pay the relevant APC), the terms of reuse of such Open Access shall be governed by a Creative Commons licence – details of these licences and which [Creative Commons](#) licence will apply to this Work are set out in our licence referred to above.

Other than as permitted in any relevant BMJ Author's Self Archiving Policies, I confirm this Work has not been accepted for publication elsewhere, is not being considered for publication elsewhere and does not duplicate material already published. I confirm all authors consent to publication of this Work and authorise the granting of this licence.

1  
2  
3 A Randomized Clinical Trial of a Decision Aid and Values Clarification Method for Parents of a  
4 Fetus or Neonate Diagnosed with a Life-Threatening Congenital Heart Defect  
5

6 Rebecca K. Delaney<sup>a</sup>; Nelangi M. Pinto<sup>b</sup>; Elissa M. Ozanne<sup>a</sup>; Louisa A. Stark<sup>c,d</sup>; Mandy L.  
7 Pershing<sup>a</sup>; Alistair Thorpe<sup>a</sup>; Holly O. Witteman<sup>e</sup>; Praveen Thokala<sup>f</sup>; Tom H. Greene<sup>a</sup>; & Angela  
8 Fagerlin<sup>a,i</sup>  
9

10 **Affiliations:** <sup>a</sup>Department of Population Health Sciences, University of Utah, Salt Lake City,  
11 UT; <sup>b</sup>Division of Pediatric Cardiology, Department of Pediatrics, University of Utah, Salt Lake  
12 City, UT; <sup>c</sup>Center for Clinical and Translational Science, University of Utah, Salt Lake City, UT;  
13 <sup>d</sup>Department of Human Genetics, University of Utah, Salt Lake City, UT; <sup>e</sup>Department of Family  
14 and Emergency Medicine, Laval University, Quebec City, Canada; <sup>f</sup>University of Sheffield,  
15 Western Bank, Sheffield, England, UK; <sup>i</sup>VA HSR&D Informatics, Decision-Enhancement and  
16 Analytic Sciences Center, VA Salt Lake City Health Care System, Salt Lake City, UT  
17  
18

19 **Address correspondence to:** Dr. Angela Fagerlin, Department of Population Health Sciences,  
20 University of Utah, 295 Chipeta Way, Salt Lake City, UT, 84108, [angie.fagerlin@hsc.utah.edu],  
21 (801) 587-0049  
22  
23

24  
25 Trial registration: NCT04437069

26  
27 **Funding:** This research was supported by the American Heart Association's Children's  
28 Strategically Focused Research Network grant (17SFRN33660465) to Dr. Fagerlin. Dr.  
29 Delaney's effort on this research was supported by the National Institutes of Health under Ruth L.  
30 Kirschstein National Research Service Award T32HL007576 from the National Heart, Lung, and  
31 Blood Institute. Holly O. Witteman is supported by a Canada Research Chair (Tier 2) in Human-  
32 Centred Digital Health.  
33

34  
35 **Conflict of Interest Disclosures:** The authors have no conflicts of interest to disclose.  
36  
37  
38  
39  
40  
41  
42  
43  
44  
45  
46  
47  
48  
49  
50  
51  
52  
53  
54  
55  
56  
57  
58  
59  
60

## Abstract

**Introduction:** Parents who receive the diagnosis of a life-threatening, complex heart defect in their fetus or neonate face a difficult choice between pursuing termination (for fetal diagnoses), palliative care, or complex surgical interventions. Shared decision making (SDM) is recommended in clinical contexts where there is clinical equipoise. SDM can be facilitated by decision aids. The International Patient Decision Aids Standards collaboration recommends the inclusion of values clarification methods (VCMs), yet little evidence exists concerning the incremental impact of VCMs on patient or surrogate decision making. This protocol describes a randomized clinical trial to evaluate the effect of a decision aid (with and without a VCM) on parental mental health and decision making within a clinical encounter.

**Methods and Analysis:** Parents who have a fetus or neonate diagnosed with one of six complex congenital heart defects diagnosed at a single tertiary center will be recruited. Data collection for the prospective observational control group was conducted September 2018 to December 2020 (N=35) and data collection for two intervention groups is ongoing (began October 2020). At least 100 participants will be randomized 1:1 to two intervention groups (decision aid only vs. decision aid with VCM). For the intervention groups, data will be collected at four time points: 1) at diagnosis, 2) post-receipt of decision aid, 3) post-decision, and 4) 3-months post-decision. Data collection for the control group was the same, except they did not receive a survey at Time 2. Linear mixed effects models will assess differences between study arms in distress (primary outcome), grief, and decision quality (secondary outcomes) at 3-months post-treatment decision.

**Ethics and Dissemination:** This study was approved by the University of Utah Institutional Review Board and the protocol is published on ClinicalTrials.gov (NCT04437069). Study findings will be presented at national conferences and with scientific research journals.

## Article Summary

### Strengths and limitations of this study:

- One study strength is that this is a randomized clinical trial design with clinically relevant, validated outcome measures.
- A second strength is that this study will add to the limited literature on the effectiveness of value clarification methods in real-world clinical contexts.
- Given that the study takes place at one tertiary center, there is potential limitation of a small sample size and reduced power for analyses.

For peer review only

## Introduction

### *Background and rationale*

Congenital heart disease occurs for about 40,000 live births per year; of these, about 2-3% are life-threatening congenital heart defects (CHDs).<sup>1-3</sup> Even with early intervention those diagnosed with life-threatening CHDs have frequent readmissions, require additional interventions and typically face a shortened life span.<sup>4</sup> A diagnosis of a severe, life-threatening CHD in a fetus or neonate is an unexpected and emotionally distressful event for parents who must then decide between termination (when diagnosed prenatally), palliative care, or surgery.<sup>5-8</sup> Parents experience significant grief,<sup>9, 10</sup> distress, depression, and anxiety<sup>11-13</sup> surrounding this difficult decision, which can compromise their mental health.<sup>14-16</sup> Providers, ethicists, and parents may perceive clinical equipoise on which treatment option (i.e., termination, palliative care, or surgery) is best for the family.<sup>17-19</sup>

Shared decision making (SDM) is an approach for supporting patient engagement with clinicians that is particularly useful for contexts, such as life-threatening CHD, which involve clinical equipoise and value-laden, complex decisions.<sup>20, 21</sup> Decision aids are tools that improve the SDM process and include information on treatment options that are evidence based, balanced and help people clarify their values.<sup>4, 22</sup> Decision aids increase patients' knowledge, and engagement related to the diagnosis and treatment decision making. In addition, studies have found greater concordance between patients' preferences and treatment received, improved patient-provider communication, and reduced uncertainty and decisional conflict in those receiving decision aids.<sup>23</sup>

1  
2  
3 The International Patient Decision Aids Standards (IPDAS) Collaboration developed criteria for  
4 a well-designed decision aid.<sup>24</sup> Values clarification methods (i.e., processes that aid patients in  
5 clarifying their values and goals in order to improve alignment between their preferences and  
6 their treatments) were included as a critical component. Although some studies have found  
7 positive effects of value clarification methods on decision outcomes, there are few rigorous  
8 studies in real-world clinical contexts that evaluate whether value clarification methods improve  
9 key outcomes, prompting calls for additional research.<sup>24-26</sup>

### 20 21 *Objectives & Hypothesis*

22 The main objective of the study is to evaluate the effect of a decision aid with and without a  
23 values clarification method on longitudinal parent mental and physical health, decision-making,  
24 and clinical encounter outcomes (e.g., quality of clinician consultation and risk communication).  
25 Since no prior data on decision aid use in CHD exist, we will also compare parents who receive  
26 the decision aid to parents who do not (prospective observational control group enrolled during  
27 decision aid development) on the aforementioned outcomes.

28 We hypothesize that parents who receive the decision aid with the values clarification method  
29 will report less distress (primary outcome), reduced grief, and better decision quality (secondary  
30 outcomes) relative to participants who receive the decision aid only across 3-months post  
31 treatment decision. We also hypothesize that participants who receive the decision aid with or  
32 without the values clarification method will report reduced distress, grief, and better decision  
33 quality relative to participants who are in the prospective observational control group.



1  
2  
3 We will also test the impact of the decision aid with a values clarification method on several  
4 exploratory measures (e.g. self-efficacy, satisfaction, and decision regret).  
5  
6  
7  
8  
9

## 10 **Methods**

### 11 *Study Design*

12  
13  
14 This is a randomized clinical trial examining the effectiveness of a decision aid and values  
15 clarification method. There are two intervention groups and one prospective observational  
16 control group. Data collection for the prospective observational control group was conducted  
17 September 2018 – December 2020 (N= 35) and data collection for the intervention groups (the  
18 primary analytic sample) began October 2020 and is ongoing. The flow of the study is outlined  
19 in Figure 1.  
20  
21  
22  
23  
24  
25  
26  
27

### 28 *Study Setting*

29  
30 This is a single site study at a children's hospital in the Intermountain West. Physicians at this  
31 hospital perform >650 fetal echocardiograms with about 125 new complex CHD diagnoses  
32 annually.  
33  
34  
35  
36

### 37 *Participants and Eligibility Criteria*

38  
39 To be eligible for the study, parents must be 18+ who have a fetus or neonate diagnosed with a  
40 complex, life-threatening CHD (whether prenatally or postnatally). While the decision aid was  
41 being developed, the control group was recruited with these guidelines. The decision aid was  
42 developed to provide information on the following six CHD diagnoses: truncus arteriosus with  
43 greater than moderate truncal valve regurgitation, pulmonary atresia with intact ventricular  
44 septum with a severely hypoplastic right ventricle that will require single ventricle palliation,  
45 complex single ventricle, complex single ventricle with heterotaxy, hypoplastic left heart  
46  
47  
48  
49  
50  
51  
52  
53  
54  
55  
56  
57  
58  
59  
60

1  
2  
3 syndrome (HLHS), and Ebstein anomaly of the tricuspid valve with greater than moderate  
4 regurgitation. These diagnoses were chosen as they were deemed preference sensitive in that  
5 surgical intervention, palliative care, and termination were all medically reasonable treatment  
6 options by expert consensus. Thus, in order to be eligible for one of the two intervention groups,  
7 the fetus/neonate must be diagnosed with one of the six aforementioned diagnoses.  
8  
9

### 10 11 12 *Recruitment and Consent*

13  
14  
15 When a fetus/neonate is diagnosed with a qualifying CHD, a pediatric cardiologist will evaluate  
16 the diagnosis to confirm eligibility for the study. When an eligible fetus/neonate is identified, the  
17 parent(s) will be approached by the study team and invited to participate in the study. One or  
18 both parents may participate. Those interested will receive a link to complete the informed  
19 consent through an electronic data capture (REDCap). If both parents consent to participation,  
20 they will receive separate links to complete their own informed consent and surveys.  
21  
22  
23  
24  
25  
26  
27  
28  
29

### 30 31 *Randomization*

32  
33 Participants will be randomized using REDCap (HIPAA-compliant remote data capture system)  
34 into one of two intervention groups, described below, after completing the baseline survey.  
35  
36 Participants will not be explicitly told which group they were randomized to. Both intervention  
37 groups will receive the same decision aid, but one arm will receive a values clarification method  
38 integrated within the decision aid, while the other group will get the decision aid without the  
39 values clarification method. The decision aid is an app on an Amazon Fire tablet, which is either  
40 given to the parent(s) in clinic if they complete the baseline survey and consent in person, or is  
41 mailed to their home if they complete the consent outside of clinic. The tablet remains in their  
42 possession for the duration of the study so that they can consult the decision aid as often as they  
43 would like.  
44  
45  
46  
47  
48  
49  
50  
51  
52  
53  
54  
55  
56  
57  
58  
59  
60

## **Development of Decision Aid and Values Clarification Method**

We used data from focus groups of parents who had a fetus or neonate diagnosed with a complex CHD, as well as semi-structured interviews with family and provider stakeholders to identify important content to include in the digital decision aid.<sup>27, 28</sup> The tool was developed through an iterative process of content drafting by the development team followed by multiple rounds of content review and revision with the research team, parent partners, and healthcare providers in relevant fields (e.g., pediatric cardiologists, surgeons, social workers, palliative care experts).

The team gathered stories about parents' experiences during several individual and group interviews.

The research team also developed a values clarification method. We began by examining qualitative data from the focus group and interviews related to factors influencing parents' choices and identifying key elements that had influenced parents' decision. The team then engaged in multiple workshop sessions, discussing how best to describe components of each value, with parent partners providing input on draft versions of these descriptions. The values clarification method interface was developed through an iterative process of creating alpha versions, testing, and revision.

### **Patient involvement**

Three parents (two females and one male) whose children were diagnosed with complex CHD were invited to serve as parent collaborators. Discussions with these parents informed the design and development of the decision aid, outcome measures that were chosen, and methods of recruitment for the study.

### **Interventions and Comparators**

#### ***Prospective Observational Control Group***

1  
2  
3 Participants in the prospective observational control group did not receive the decision aid or  
4 values clarification method. Participants were enrolled during the development of the decision  
5 aid to prevent contamination by providers or other families exposed to the decision aid.  
6  
7

8  
9  
10 Participants received standard clinical care.

### 11 ***Decision Aid***

12  
13  
14 The intervention group participants receive a decision aid after diagnosis, and then continue with  
15 the standard care. The decision aid includes eight sections, which are broadly described in Table  
16  
17 1. Section 5 is individualized to each participant to show information specific to their  
18  
19 fetus/neonate's diagnosis. The decision aid is an app that is loaded onto an Amazon Fire tablet,  
20  
21 which is given to participants.  
22  
23  
24  
25

### 26 ***Values Clarification Method***

27  
28 The Values Clarification Method is designed to help participants clarify the choice that feels  
29  
30 better for them and their family. For those randomized to receive the values clarification method,  
31  
32 the decision aid includes an extra module with the following content:  
33  
34

35 *What Matters Most to You.* The goal of this exercise is to help participants think through some  
36  
37 long term and short term consequences of their decision. When faced with a life-threatening  
38  
39 diagnosis, there are many consequences to consider, and participants may not know how they  
40  
41 feel about each of them or how to weigh them by importance or value. To begin, participants  
42  
43 choose two of the possible treatment decision options (surgery, comfort care, and ending the  
44  
45 pregnancy) and compare them in 10 different topic areas. Some examples of the topics are: time  
46  
47 in the hospital, the risk that the child will have impairments, financial issues, and life in  
48  
49 adulthood. The purpose of choosing two potential decisions at a time is to put them on a clear  
50  
51 spectrum in a preference scale, as weighting all three at once would be too complicated in terms  
52  
53  
54  
55  
56  
57  
58  
59  
60

1  
2  
3 of determining weights. For each topic, there is a sliding scale between the two choices where  
4 they drag the slider to show how much they prefer one choice over another. At the end, they are  
5 shown a summary of which choice they preferred for each category. They are not issued a  
6 definitive result; the values clarification method allows them to look at a summary of their  
7 choices and draw their own conclusion about what they chose. Participants may repeat the  
8 exercise, selecting other options to compare.  
9

10  
11 After the interventions were developed in English, the decision aid and values clarification  
12 method were translated into Spanish by certified translators in the University of Utah's Office of  
13 Research Participant Advocacy (as were consent documents and survey measures).  
14

### 15 16 17 18 19 20 21 22 23 24 **Outcomes**

25  
26 All study measures were categorized into three conceptual domains: parental mental and physical  
27 health, decision-making quality, and clinical encounter (e.g., consultation quality) in Table 2.  
28

29  
30 The primary outcome is distress, measured by the Brief Symptom Inventory Global Severity  
31 Index.<sup>29</sup> The co-secondary outcomes are perinatal grief and decision quality (i.e., adequate  
32 knowledge and concordance between participants' preferences and treatment decision).<sup>30, 31</sup>  
33

34  
35 Additional exploratory outcomes will also be measured. Descriptions of all study measures and  
36 time points for survey data collection are included in Table 2. Parent characteristics will be  
37 examined as potential covariates.  
38  
39

### 40 41 42 43 44 45 **Sample Size and Power Calculation**

46  
47 At least 100 families will be randomized 1:1 to the two intervention groups, allowing up to two  
48 parents to participate per fetus/neonate. Our sample size calculations were based on the primary  
49 comparison between DA with and without the VCE. Based on our previous work,<sup>32</sup> we assume  $\geq$   
50 80% retention, a 3-month pre-post  $R \geq 0.5$ , an average of  $\geq 1.75$  participating parents per  
51  
52  
53  
54  
55  
56  
57  
58  
59  
60

1  
2  
3 participating family, an intra-class correlation (ICC) between parents in the same family  $\leq 0.50$ ,  
4 and  $\geq 50$  families randomized to each of the intervention groups (decision aid only and decision  
5 aid with values clarification method). Using these assumptions, the mixed effects model will  
6 provide 80% power with 2-sided  $\alpha=0.05$  to detect a mean difference in the primary outcome,  
7 distress, equal to 0.50 of 1 standard deviation. This represents a moderate effect size in Cohen's  
8 terminology.<sup>33</sup> Assuming a pooled SD in the global distress of 0.56 units,<sup>32</sup> the 0.50 SDs  
9 represents a minimum detectable effect of 0.28 units.

### 19 **Data Collection**

20  
21 Potentially eligible parents are identified and approached by a study team member who is trained  
22 in interacting with people who are going through highly emotional medical events. If the parents  
23 are deemed to be under too much distress, they are not approached. If the parents are deemed  
24 approachable by the trained staff, the study is presented using an informational pamphlet, and the  
25 potential participant(s) are encouraged to follow the link or QR code on the pamphlet if they  
26 would like to participate in the study. The parents who were given the link are recorded in a  
27 recruitment tracker. All parents who follow the link on their own are consented to participate in  
28 the study and recorded in REDCap. This usually happens with parents whose fetuses are  
29 prenatally-diagnosed, and they follow the link from their home electronic devices. If the neonate  
30 was postnatally-diagnosed, the parents are approached in the same manner in the hospital and are  
31 given the opportunity to consent and participate in the study using a tablet in person. Parents who  
32 are found to be ineligible or who decline participation will be recorded along with the reason.

### 49 *Data Abstraction*

50  
51 When screening for eligibility, the fetus/neonate diagnosis (verified by a pediatric cardiologist)  
52 and date of diagnosis will be abstracted. Once enrolled in the study, gestational age at birth, the  
53  
54  
55  
56  
57  
58  
59  
60

1  
2  
3 presence of other syndromes/birth defects, and the dates of surgery (if applicable) will be  
4  
5 abstracted from the medical record and documented. Further surgery dates will be recorded by  
6  
7 the research coordinator.  
8  
9

### 10 *Surveys*

11  
12 Participants in the prospective observational control group filled out surveys at three time points:  
13  
14 1) Baseline, 2) Post-Decision, and 3) Three Months Post-Decision (see Table 1 for an overview  
15  
16 of measurements). There are four survey time points for the intervention groups: 1) Baseline, 2)  
17  
18 Post-Viewing of the Decision Aid (or Decision Aid and Values Clarification Method) but prior  
19  
20 to making the decision, 3) Post-Decision, and 4) Three Months Post-Decision. Surveys are  
21  
22 administered via REDCap by sending an email to the participant with a survey link. Participants  
23  
24 may request paper surveys to be mailed to them. If the participant does not access the survey  
25  
26 link, they will be contacted by phone or in person during a routine clinic visit to ask them to fill  
27  
28 out the survey or will be mailed a paper survey.  
29  
30  
31  
32

### 33 *Data Management and Monitoring*

34  
35 Adverse events that occur during data collection will be recorded by the study coordinator, along  
36  
37 with any circumstances that make particular participants unique. In this way, unanticipated data  
38  
39 points during analysis may be explained and accounted for. Additionally, information about  
40  
41 mental health resources are given to participants at the end of each survey, including a 24 hour, 7  
42  
43 days-a-week phone crisis service that is staffed by mental health professionals providing  
44  
45 emotional support, assistance, crisis interventions, and suicide preventions to individuals  
46  
47 experiencing emotional distress or psychiatric crisis. The social worker at the children's hospital  
48  
49 also has their contact information listed for participants to be able to reach out.  
50  
51  
52  
53  
54  
55  
56  
57  
58  
59  
60

1  
2  
3 Frequent reports will be run to detect data errors or missing data. Any issues will be addressed  
4 during a weekly meeting between the study coordinator, post-doctoral fellow(s), and the  
5  
6 principal investigator.  
7  
8

### 9 10 **Data Analysis Plan**

11  
12 After data collection, we will use standardized mean differences to assess balance between  
13  
14 intervention groups in baseline levels of study endpoints and other potential prognostic baseline  
15  
16 indicators, including participants' age, race, and comorbidities. Outcome variables exhibiting  
17  
18 substantial skewness may be transformed to better approximate normality. All participants will  
19  
20 be analyzed in their assigned intervention group according to intention-to-treat, irrespective of  
21  
22 adherence to viewing the decision aid or completing the values clarification method. Although  
23  
24 multiple outcomes will be considered, we have designated a single primary outcome (the BSI  
25  
26 Global Severity Index of global distress, described above) and a single primary comparison time  
27  
28 for this outcome at 3 months.<sup>34</sup> We do not plan formal multiple comparison adjustments for  
29  
30 secondary and exploratory outcomes. Results for secondary and exploratory outcomes will  
31  
32 support or qualify the analyses of the primary outcome, and will be interpreted based on the  
33  
34 overall pattern of results with awareness that some nominally significant relationships may be  
35  
36 false positive findings in the context of multiple analyses. If there is sufficient power to detect  
37  
38 differences, exploratory sub-group analyses may be conducted to detect differences by factors  
39  
40 such as pre versus post-natal diagnoses, CHD diagnosis, and provider specialty. We also do not  
41  
42 plan formal multiple comparison adjustment for the randomized comparison between  
43  
44 intervention groups (Decision Aid Only v. Decision Aid with Values Clarification Method) and  
45  
46 the non-randomized comparison (Decision Aid v. Control), as these comparisons address distinct  
47  
48 hypotheses and are thus appropriate for evaluation on a comparison wise basis.<sup>35</sup>  
49  
50  
51  
52  
53  
54  
55  
56  
57  
58  
59  
60



### Determining Intervention Effects on Study Endpoints

*Randomized Comparisons Between Intervention Groups (Decision Aid Only V. Decision Aid with Values Clarification Method)*. The primary outcome, distress, measured at post decision aid, post decision, and 3-month will be compared between groups by applying restricted maximum likelihood estimation to a linear mixed effects model<sup>36</sup> with fixed provider effects and random family effects to account for clustering of outcomes due to these factors and an unstructured residual covariance model to account for serial correlation across the three longitudinal assessments. Inclusion of fixed effects for provider is appropriate since families are randomized to the two intervention groups for each provider, and may improve statistical power by controlling for provider variation. The model will also include fixed effects for randomized assignment as well as the baseline distress.<sup>34</sup> Additional pre-specified covariate adjustment is not planned, as we are not aware of further baseline factors that are likely to be strongly associated with the 3-month distress once the baseline distress is accounted for.<sup>35</sup> However, should a prognostic baseline factor exhibit imbalance between the randomized groups, a post-hoc sensitivity analysis will be performed with covariate adjustment for that factor to assess the robustness of the results to the imbalance. The 3-month comparison will represent the primary contrast for assessing the effect of the decision support intervention. It is possible that the full mixed effects model will fail to converge due to the inclusion of separate random effects for provider and family as well as an unstructured covariate matrix for repeated assessments in the same patient. In the event the full model fails to converge, we will repeat analyses after dropping the provider random effect. If this also fails to provide convergence, the unstructured covariance model for serial correlation will be simplified.

1  
2  
3 Similar mixed effects analyses will be used for numeric secondary and exploratory outcome  
4 variables, including the perinatal grief (secondary outcome) and most of the exploratory  
5 outcomes. For binary outcomes, including the decision quality secondary outcome, we will apply  
6 generalized estimating equations (GEE) for log-binomial regression (if convergence is achieved)  
7 or modified Poisson regression<sup>37</sup> (if not) to compare the proportions of participants with the  
8 outcome between the intervention groups. The post-decision comparison will be the main  
9 comparison for evaluating the effects of the interventions on secondary and exploratory  
10 outcomes hypothesized to respond quickly to the decision aid (e.g. parent-provider  
11 communication, self-efficacy) while the 3-month comparison will represent the main treatment  
12 contrast for outcomes hypothesized to respond over a longer time (e.g., grief, decision regret).  
13  
14  
15  
16  
17  
18  
19  
20  
21  
22  
23  
24  
25  
26  
27

28 *Non-Randomized Comparisons of Decision Aid Only v. Control Group.* The primary outcome,  
29 distress, will be compared between the groups receiving the decision aid and the control group  
30 using an extension of the linear mixed effects model described above. The model will again  
31 include fixed effects for provider and random effects for family and an unstructured covariance  
32 matrix to account serial correlation, but will be expanded to include all three treatment groups  
33 and will include not only the baseline distress measure but also timing of diagnosis, race, and  
34 literacy level as covariates to reduce bias in these non-randomized comparisons. The comparison  
35 of Decision Aid without Values Clarification Method vs. Control will represent the primary  
36 treatment comparison to evaluate the effect of the decision aid. The comparison of Decision Aid  
37 with Values Clarification Method) vs. Control will provide a secondary assessment of the  
38 combined effect of decision support and values clarification method together. Similar extensions  
39 using linear mixed models for numeric outcomes and GEE for binary or categorical outcomes  
40  
41  
42  
43  
44  
45  
46  
47  
48  
49  
50  
51  
52  
53  
54  
55  
56  
57  
58  
59  
60

1  
2  
3 will be applied for additional non-randomized comparisons between the decision support and  
4  
5 control groups.  
6  
7  
8  
9

10 *Missing Data.* The proposed analyses of the primary and numeric secondary and exploratory  
11  
12 outcomes apply likelihood-based inference and will thus remain approximately unbiased in the  
13  
14 presence of missing data so long as the pattern of missingness follows a missing at random  
15  
16 (MAR) mechanism.<sup>38</sup> To evaluate risk of bias from missing data patterns which depend on  
17  
18 measured factors not included in the analytic models, participant characteristics will be  
19  
20 compared between participants with complete data for the primary and main secondary outcomes  
21  
22 and those participants with incomplete data. If substantial imbalances are detected, or if > 10%  
23  
24 of participants have missing data for a primary or secondary outcome, multiple imputation will  
25  
26 be used to impute missing outcome measurements. The multiple imputation will be performed  
27  
28 with a Markov Chain Monte Carlo (MCMC) algorithm using an imputation model incorporating  
29  
30 each analysis variable as well as auxiliary variables that are related to the probability of  
31  
32 missingness.<sup>39</sup> Rubin's formulae will be used to account for the uncertainty introduced by the  
33  
34 missing data. When data are missing for items within scales, we will use recommended  
35  
36 imputation procedures rather than deleting participants listwise from the analysis.<sup>38</sup>  
37  
38  
39  
40  
41  
42  
43

#### 44 **Ethics and Dissemination**

45  
46 This study was approved by the Institutional Review Board (IRB), and continues to be re-  
47  
48 approved yearly according to the IRB's standards. Important modifications made to the data  
49  
50 collection routine section of the IRB application will be reported in the findings if those changes  
51  
52 are found to have impacted the data.  
53  
54  
55  
56  
57  
58  
59  
60

1  
2  
3  
4  
5  
6  
7  
8  
9  
10  
11  
12  
13  
14  
15  
16  
17  
18  
19  
20  
21  
22  
23  
24  
25  
26  
27  
28  
29  
30  
31  
32  
33  
34  
35  
36  
37  
38  
39  
40  
41  
42  
43  
44  
45  
46  
47  
48  
49  
50  
51  
52  
53  
54  
55  
56  
57  
58  
59  
60

Consent to participate in the study is obtained from participants when they fill out the baseline survey. As this is a low-risk study, no signature is required. All survey data will be de-identified before sharing the results, posing no risk to participant confidentiality. Access to the data may be granted to outside parties on a case-by-case basis by the discretion of the PI. The study is registered on ClinicalTrials.gov (NCT04437069) where the public can access the full protocol. Study modifications and results will also be reported on ClinicalTrials.gov. In addition, findings will be disseminated through presentations at scientific meetings and publications in peer-reviewed journals.

## Discussion

Parents of a fetus or neonate diagnosed with a life-threatening congenital heart defect are confronted with a significant and challenging decision between termination (when diagnosed prenatally), palliative care, or surgery.<sup>5-8</sup> This preference-sensitive decision should be supported through shared decision making whereby the family and providers can mutually engage in treatment decision making which is driven by what matters most to families and understanding of the diagnosis and treatment options.<sup>20, 21</sup> Decision aids are one approach to facilitate shared decision making.<sup>40</sup> The present study aims to evaluate the effect of a novel, family-centered decision aid on parent mental and physical health, decision-making, and clinical encounter outcomes. Few studies have examined how effective values clarification methods, which the International Patient Decision Aids Standards collaborative added as criteria for decision aids, are when combined with a decision aid in clinical contexts.<sup>26</sup> Therefore, this study also aims to

1  
2  
3 contribute to the literature by examining the effect of the decision aid with and without a values  
4 clarification method.  
5  
6  
7  
8  
9

10 There are some potential limitations to note for this study that are common when studying  
11 pediatric conditions. There may be issues with meeting sample size requirements for sufficient  
12 statistical power. This issue could arise due to the rarity of severe CHD diagnoses and the  
13 potential for high attrition as parents are under high emotional burdens and distress surrounding  
14 the diagnosis, decision, and coping or managing the treatment they choose. Our study design  
15 attempts to proactively address these issues. For instance, we will use extensive follow-up  
16 procedures via telephone or in person to minimize attrition. If questionnaire burden results in  
17 higher than expected attrition, we will limit questions to the primary and secondary outcomes.  
18  
19  
20  
21  
22  
23  
24  
25  
26  
27  
28  
29

30  
31 Our study will significantly contribute to advancing decision support and counseling for parents  
32 making life-altering decisions for their fetus or neonate with a life-threatening heart defect. This  
33 important and innovative decision aid and values clarification method will also build on the  
34 dearth of decision aids in pediatric, surrogate decision-making contexts.  
35  
36  
37  
38  
39  
40  
41  
42  
43  
44  
45  
46  
47  
48  
49  
50  
51  
52  
53  
54  
55  
56  
57  
58  
59  
60

**Table 1.** Decision Aid Content

|                                                      |                                                                                                                                                                                                                                                                                                                                                                                                                                                                                                                                                                                                                                                                    |
|------------------------------------------------------|--------------------------------------------------------------------------------------------------------------------------------------------------------------------------------------------------------------------------------------------------------------------------------------------------------------------------------------------------------------------------------------------------------------------------------------------------------------------------------------------------------------------------------------------------------------------------------------------------------------------------------------------------------------------|
| 1. <i>You Are Not Alone</i>                          | This introductory video (07:53 min), is intended to normalize the experience and set the stage before some of the more technical information in the tool. Key messages are: this is a difficult time for you, it's OK to cry, you didn't cause this, and you are the most qualified to make this decision. The video also describes the goals of the tool.                                                                                                                                                                                                                                                                                                         |
| 2. <i>How the Heart Works</i>                        | This section includes animations and information on the cardiovascular system, normal fetal and post-fetal heart circulation, defects that can take place during heart development that lead to abnormal heart function, and a glossary of medical terms.                                                                                                                                                                                                                                                                                                                                                                                                          |
| 3. <i>What is a Congenital Heart Defect?</i>         | This section defines congenital heart defects and how they are caused and diagnosed.                                                                                                                                                                                                                                                                                                                                                                                                                                                                                                                                                                               |
| 4. <i>How We Talk About Congenital Heart Defects</i> | This section introduces parents to topics and terms that are often used when discussing congenital heart defects, including statistics, diagnosis variability, survival and quality of life.                                                                                                                                                                                                                                                                                                                                                                                                                                                                       |
| 5. <i>Learn More About Your Baby's Diagnosis</i>     | This section shows parents individualized information specific to their fetus/baby's diagnosis. Diagnoses available in this section include Hypoplastic Left Heart Syndrome (HLHS), Complex Single Ventricle (CSV), Complex Single Ventricle with Heterotaxy (Isomerism), Pulmonary Atresia with Intact Ventricular Septum (PA/IVS), Ebstein's Anomaly of the Tricuspid Valve (With Severe Leak) and Truncus Arteriosus. Each diagnosis profile includes animated videos depicting the defect, statistics related to how common the defect is, other associated conditions, risks of having another child with the defect and expected outcomes without treatment. |
| 6. <i>Learn More About Your Choices</i>              | This is divided into three sections: Surgery, Comfort Care, and Ending the Pregnancy. Each section begins with a "What to Expect" overview and includes a description of the medical team members who may be involved, financial implications, living with this decision, and links to other websites and                                                                                                                                                                                                                                                                                                                                                          |

|                                             |                                                                                                                                                                                                                                                                                                                                                                                                                                                                            |
|---------------------------------------------|----------------------------------------------------------------------------------------------------------------------------------------------------------------------------------------------------------------------------------------------------------------------------------------------------------------------------------------------------------------------------------------------------------------------------------------------------------------------------|
|                                             | support groups. Additional information is tailored to each choice.                                                                                                                                                                                                                                                                                                                                                                                                         |
| 7. <i>Firsthand Experiences</i>             | This section contains stories from parents who chose Comfort Care, Surgery or Ending the Pregnancy, in which they describe their personal experiences. Five stories are provided for each of the three choices, reflecting a variety of different outcomes. Surgery stories include examples where the child had no serious medical complications growing up, examples where the child does have complications, and examples where the child did not survive post-surgery. |
| 8. <i>Questions You Can Ask Your Doctor</i> | This is a list of possible questions parents may wish to ask care providers. Parents can checkmark the questions they wish to take with them to their doctor, and the tool will email them just these questions. They can then either print or access their questions digitally while in their appointment.                                                                                                                                                                |

**Table 2.** Study Outcomes, Descriptions, and Survey Measure Time Points

| Measure                                    | Description                                                                                                                                                                                                                                                                                                                                                                                                                                                                                          | Measure Timepoints |        |        |        |
|--------------------------------------------|------------------------------------------------------------------------------------------------------------------------------------------------------------------------------------------------------------------------------------------------------------------------------------------------------------------------------------------------------------------------------------------------------------------------------------------------------------------------------------------------------|--------------------|--------|--------|--------|
|                                            |                                                                                                                                                                                                                                                                                                                                                                                                                                                                                                      | Time 1             | Time 2 | Time 3 | Time 4 |
| <b>Primary Outcome</b>                     |                                                                                                                                                                                                                                                                                                                                                                                                                                                                                                      |                    |        |        |        |
| <b>Mental and Physical Health Outcomes</b> |                                                                                                                                                                                                                                                                                                                                                                                                                                                                                                      |                    |        |        |        |
| Distress <sup>29</sup>                     | Basic Symptom Inventory (BSI) Global Severity Index of Global Distress: a validated scale of 53 questions that indicate the degree of stress the participant has experienced within the previous seven days. Answers range on a 5-point Likert scale from 0=not at all to 4=extremely.                                                                                                                                                                                                               | X                  | X      | X      | X      |
| <b>Secondary Outcomes</b>                  |                                                                                                                                                                                                                                                                                                                                                                                                                                                                                                      |                    |        |        |        |
| <b>Decision Making Outcomes</b>            |                                                                                                                                                                                                                                                                                                                                                                                                                                                                                                      |                    |        |        |        |
| Perinatal Grief <sup>30</sup>              | Twenty-seven questions measuring grief, coping, and despair following the death of a child. Rated on a 5-point Likert scale that ranges from 1=strongly disagree to 5=strongly agree.                                                                                                                                                                                                                                                                                                                |                    | X      | X      | X      |
| Decision Quality (Values) <sup>31</sup>    | Six questions on parent' decisional values (e.g., "How important it is to you that your child have as little pain and discomfort from treatment as possible?") rated on a 6-point Likert scale from 1=most important to 6=not as important.                                                                                                                                                                                                                                                          |                    | X      | X      | X      |
| Decision Quality (Knowledge) <sup>31</sup> | Twenty-six questions assessing the participants' knowledge of treatment options for CHD in two domains. The first domain regards understanding about CHD diagnosis and what the heart does, the available options, and the outcomes of comfort care. The second domain regards understanding about the outcomes of surgery/intervention and the impact of CHD on family. 21 of the questions use a dichotomous response format (either "true / false" or "yes/no"); 5 questions are multiple choice. |                    | X      | X      | X      |



1  
2  
3  
4  
5  
6  
7  
8  
9  
10  
11  
12  
13  
14  
15  
16  
17  
18  
19  
20  
21  
22  
23  
24  
25  
26  
27  
28  
29  
30  
31  
32  
33  
34  
35  
36  
37  
38  
39  
40  
41  
42  
43  
44  
45  
46  
47

| Exploratory Outcomes                                |                                                                                                                                                                                                                                                                                                                                                                                                                                                                                                                            |   |   |   |   |
|-----------------------------------------------------|----------------------------------------------------------------------------------------------------------------------------------------------------------------------------------------------------------------------------------------------------------------------------------------------------------------------------------------------------------------------------------------------------------------------------------------------------------------------------------------------------------------------------|---|---|---|---|
| Mental and Physical Health Outcomes                 |                                                                                                                                                                                                                                                                                                                                                                                                                                                                                                                            |   |   |   |   |
| Mental and Physical Functional Health <sup>41</sup> | SF-12: Twelve items measuring the respondents' health across multiple dimensions. Answers rated on a 5-point Likert scale ranging from 1=excellent to 5=poor for three questions; answers are given in a dichotomous (yes/no) format for four questions; answers are given on a 6-point Likert scale ranging from 1=all of the time to 6=none of the time for three questions; answers are given in a trichotomous format (yes, limited a little; yes, limited a lot; no, not limited at all) for the final two questions. | X |   |   | X |
| Parental Quality of Life <sup>42</sup>              | ICCAP: Thirty-two questions to assess the impact on parental quality of life. Four questions ask about contact with caregivers, six ask about support from social networks, five ask about partner relationships, four ask about the participant's state of mind, and the remaining thirteen ask about fear and anxiety. Answers range on a 4-point Likert scale that ranges from 1=strongly disagree to 4=strongly agree, with a "not applicable" option.                                                                 |   |   | X | X |
| Decision Making Outcomes                            |                                                                                                                                                                                                                                                                                                                                                                                                                                                                                                                            |   |   |   |   |
| Preference for SDM <sup>43</sup>                    | Adaption of Degner & Sloan's Control Preference Scale - A single question on how participants plan to make the decision. Responses include 1=My doctor(s) will make the decision with little input from me, 2=My doctor(s) will make the decision but will seriously consider my opinion, 3=My doctor(s) and I will make the decision together, 4=I will make the decision after seriously considering my doctor(s) opinion, 5=I will make the decision with little input from my doctor(s).                               | X | X |   | X |

|                                               |                                                                                                                                                                                                                                                                                                                                                                                                                                                                                                          |   |   |   |   |
|-----------------------------------------------|----------------------------------------------------------------------------------------------------------------------------------------------------------------------------------------------------------------------------------------------------------------------------------------------------------------------------------------------------------------------------------------------------------------------------------------------------------------------------------------------------------|---|---|---|---|
| Preparation for Decision Making <sup>44</sup> | A validated scale which will assess participants' perspectives of the decision aid's usefulness in preparing them to communicate with their clinicians and for Shared Decision Making. These questions are answered on a Likert scale ranging from 1=not at all to 5=a great deal.                                                                                                                                                                                                                       |   | X |   |   |
| Decision Self-Efficacy <sup>45</sup>          | Eleven questions to assess self-efficacy for making an informed choice (e.g., getting needed information, asking questions, expressing opinions) using a 5-point Likert scale ranging from 0=not at all confident to 4=extremely confident.                                                                                                                                                                                                                                                              | X | X | X |   |
| Decision Conflict <sup>46</sup>               | Sixteen questions measuring: 1) perceptions of uncertainty in choosing options, 2) feelings of having adequate knowledge and clear values, and 3) effective decision making. All items use a 5-point Likert scale ranging from 0=strongly disagree to 4=strongly agree.                                                                                                                                                                                                                                  |   | X | X | X |
| Decision Regret <sup>47</sup>                 | Five questions asking participants to reflect on the decision they made about which treatment option they chose for their child. All questions assessed on a 5-point Likert scale from 1=strongly disagree to 5=strongly agree.                                                                                                                                                                                                                                                                          |   |   |   | X |
| Use of Information Sources                    | Extent that participants consulted any of 10 sources of health information. 2 sources are about personal relationships (i.e., relatives and friends), 3 are about mass media (i.e., exposure to television/movies, magazines, and books about CHD), 2 are educational/research sources (e.g., scientific journals) and the remaining 3 are about providers, support groups, and other parents who have a child with CHD. Answers rated on a 5-point Likert scale ranging from 1=never to 5=a great deal. |   | X |   |   |

|                                                     |                                                                                                                                                                                                                                                                                                                                                     |   |   |   |   |
|-----------------------------------------------------|-----------------------------------------------------------------------------------------------------------------------------------------------------------------------------------------------------------------------------------------------------------------------------------------------------------------------------------------------------|---|---|---|---|
| Treatment Choice                                    | Treatment Choice will be assessed by asking participants to identify which treatment they chose. Using electronic health records, we will record the child's actual treatment in case of parental change of mind or misreport.                                                                                                                      |   | X | X | X |
| Acceptability of Decision Aid                       | Participants answered five questions about if they used the decision aid (DA) before their appointment or during their appointment, their likelihood to recommend the DA, the amount of information presented, and if the DA seemed biased.                                                                                                         |   | X |   |   |
| <b>Clinical Encounter Outcomes</b>                  |                                                                                                                                                                                                                                                                                                                                                     |   |   |   |   |
| COMRADE <sup>48</sup>                               | Ten questions on 5-point scale (1=strongly disagree, 5=strongly agree) to evaluate the participant's perspective of the effectiveness of risk communication and treatment decision making in clinician consultations.                                                                                                                               |   | X | X |   |
| Consultation Quality <sup>49</sup>                  | Participants complete 2 questions that measure the quality of consultation. One measures the perceived usefulness of consultation on a 7 point Likert scale that ranges from 0=not at all useful to 6=very useful. The second question measures participants' perspective regarding whether the clinician was biased towards any certain treatment. | X |   |   | X |
| <b>Parents' Characteristics and Survey Feedback</b> |                                                                                                                                                                                                                                                                                                                                                     |   |   |   |   |
| Demographics                                        | Participants indicate their gender, education, race, ethnicity, number of children, religion, religiosity, marital status, and whether or not they have health insurance.                                                                                                                                                                           | X |   |   |   |
| Literacy <sup>50</sup>                              | Three validated, brief questions identifying participants with inadequate health literacy.                                                                                                                                                                                                                                                          | X |   |   |   |

|                           |                                                                                                                                                                                                                                                                                                                                                                                                                         |   |   |   |   |
|---------------------------|-------------------------------------------------------------------------------------------------------------------------------------------------------------------------------------------------------------------------------------------------------------------------------------------------------------------------------------------------------------------------------------------------------------------------|---|---|---|---|
| Numeracy <sup>51</sup>    | A validated scale of 8 questions that distinguish an individual's quantitative ability without asking overly-invasive questions. Answers are rated on a 6-point Likert scale ranging from 1=not at all good/never to 6=extremely good/very often for six questions, 1=always prefer percentages to 6=always prefer numbers for one question, and 1=always prefer percentages to 6=always prefer words for one question. | X |   |   |   |
| Religiosity <sup>52</sup> | Two items asking “How often do you attend church or other religious meetings” (1=Never to 6=More than once/week) and “How often do you spend time in private religious activities, such as prayer, meditation or Bible study” (1=Rarely or never to 6=More than once a day)                                                                                                                                             | X |   |   |   |
| Assessing Survey Burden   | Six yes/no questions asked if the survey had burdensome questions, one 5-point Likert scale question asked about how useful the participant perceived the survey would be (1=not at all useful and 5=very useful), two 5-point Likert scale questions asked participants to rate how burdensome/time consuming the survey was from 1=time consuming/burdensome to 5=quick/easy.                                         | X | X | X | X |

Note: Time 1= at diagnosis, Time 2= post-receipt of decision aid, Time 3= post-decision, Time 4= 3 months post- decision

Figure 1. Study Timeline

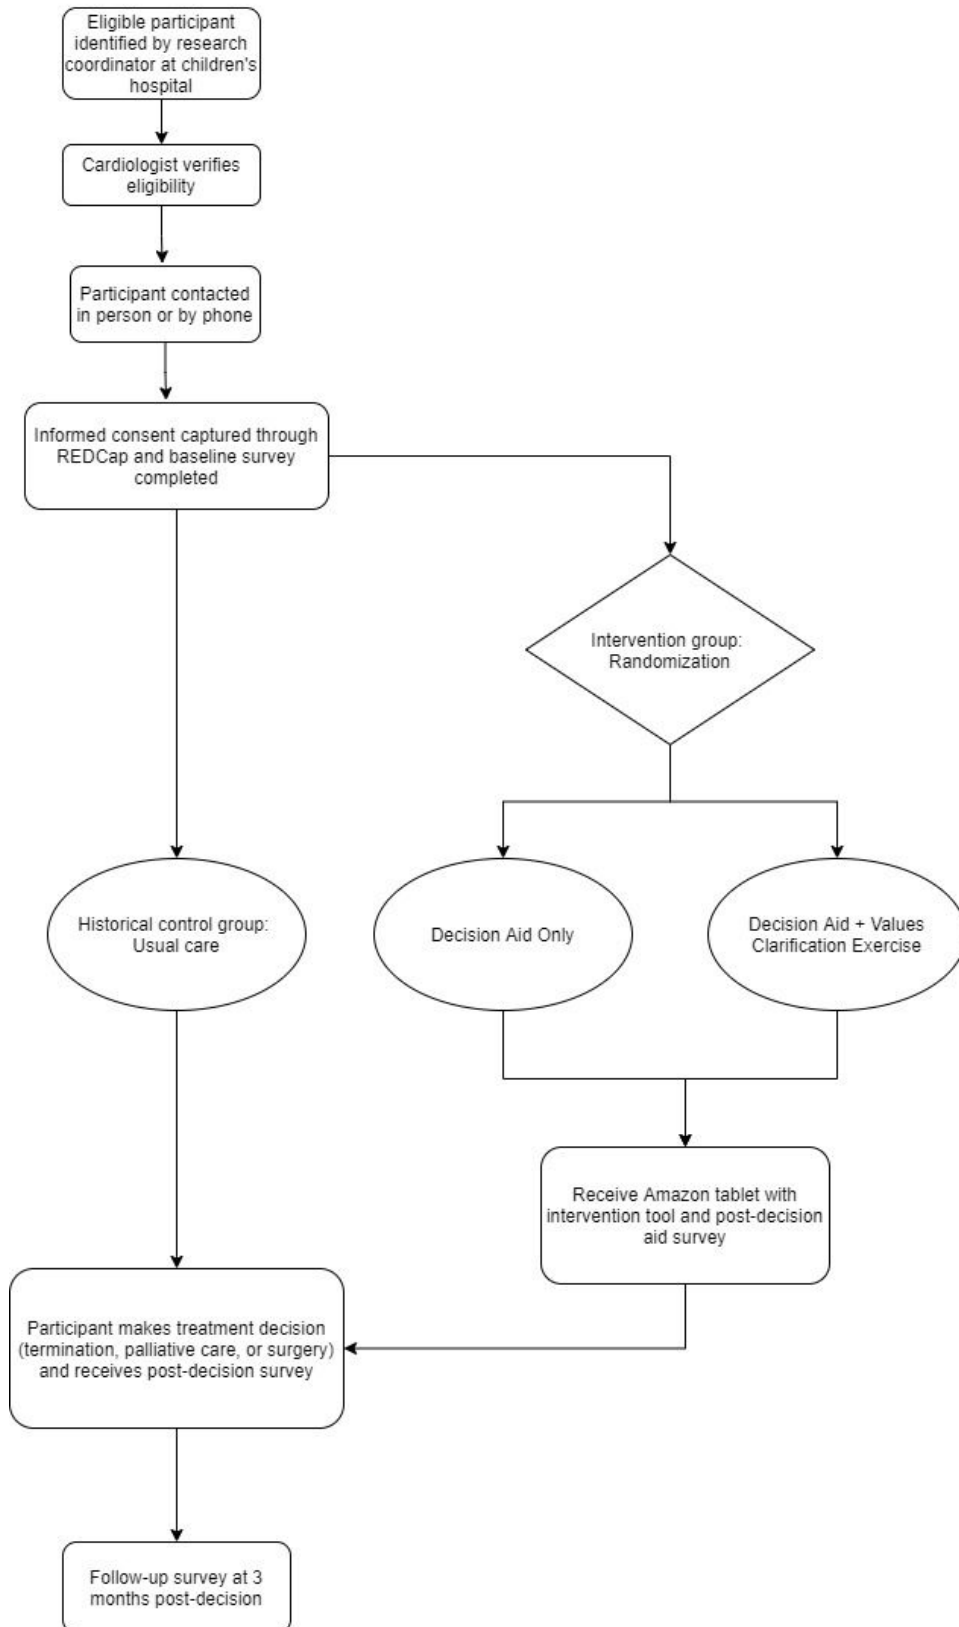

## References

1. Oster ME, Lee KA, Honein MA, Riehle-Colarusso T, Shin M, Correa A. Temporal trends in survival among infants with critical congenital heart defects. *Pediatrics*. 2013;131(5):e1502-8. PMC4471949.
2. Hoffman JI, Kaplan S. The incidence of congenital heart disease. *J Am Coll Cardiol*. 2002;39(12):1890-900.
3. Reller MD, Strickland MJ, Riehle-Colarusso T, Mahle WT, Correa A. Prevalence of congenital heart defects in metropolitan atlanta, 1998-2005. *J Pediatr*. 2008;153(6):807-13. PMC2613036.
4. Peterson C, Dawson A, Grosse SD, Riehle-Colarusso T, Olney RS, Tanner JP, et al. Hospitalizations, costs, and mortality among infants with critical congenital heart disease: How important is timely detection? *Birth Defects Res A Clin Mol Teratol*. 2013;97(10):664-72. PMC4473256.
5. Barron DJ, Kilby MD, Davies B, Wright JG, Jones TJ, Brawn WJ. Hypoplastic left heart syndrome. *Lancet*. 2009;374(9689):551-64.
6. Bertaud S, Lloyd DF, Laddie J, Razavi R. The importance of early involvement of paediatric palliative care for patients with severe congenital heart disease. *Arch Dis Child*. 2016;101(10):984-7.
7. Chenni N, Lacroze V, Pouet C, Fraise A, Kreitmann B, Gamarre M, et al. Fetal heart disease and interruption of pregnancy: Factors influencing the parental decision-making process. *Prenatal Diagnosis*. 2012;32(2):168-72.
8. Zeigler VL. Ethical principles and parental choice: Treatment options for neonates with hypoplastic left heart syndrome. *Pediatr Nurs*. 2003;29(1):65-9.
9. Davies V, Gledhill J, McFadyen A, Whitlow B, Economides D. Psychological outcome in women undergoing termination of pregnancy for ultrasound-detected fetal anomaly in the first and second trimesters: A pilot study. *Ultrasound Obstet Gynecol*. 2005;25(4):389-92.
10. Korenromp MJ, Christiaens GC, van den Bout J, Mulder EJ, Hunfeld JA, Bilardo CM, et al. Long-term psychological consequences of pregnancy termination for fetal abnormality: A cross-sectional study. *Prenat Diagn*. 2005;25(3):253-60.
11. López R, Frangini P, Ramírez M, Valenzuela PM, Terrazas C, Pérez CA, et al. Well-being and agency in parents of children with congenital heart disease: A survey in chile. *World J Pediatr Congenit Heart Surg*. 2016;7(2):139-45.
12. Lawoko S, Soares JJ. Distress and hopelessness among parents of children with congenital heart disease, parents of children with other diseases, and parents of healthy children. *J Psychosom Res*. 2002;52(4):193-208.
13. Uzark K, Jones K. Parenting stress and children with heart disease. *J Pediatr Health Care*. 2003;17(4):163-8.
14. Bevilacqua F, Palatta S, Mirante N, Cuttini M, Seganti G, Dotta A, et al. Birth of a child with congenital heart disease: Emotional reactions of mothers and fathers according to time of diagnosis. *J Matern Fetal Neonatal Med*. 2013;26(12):1249-53.
15. Kaasen A, Helbig A, Malt U, Naes T, Skari H, Haugen G. Acute maternal social dysfunction, health perception and psychological distress after ultrasonographic detection of a fetal structural anomaly. *BJOG: An International Journal of Obstetrics & Gynaecology*. 2010;117(9):1127-38.

16. Vrijmoet-Wiersma CM, Ottenkamp J, van Roozendaal M, Grootenhuis MA, Koopman HM. A multicentric study of disease-related stress, and perceived vulnerability, in parents of children with congenital cardiac disease. *Cardiol Young*. 2009;19(6):608-14.
17. Kon AA. Healthcare providers must offer palliative treatment to parents of neonates with hypoplastic left heart syndrome. *Arch Pediatr Adolesc Med*. 2008;162(9):844-8.
18. Muenke M, Kruszka P, Sable C, Belmont J. *Congenital heart disease: Molecular genetics, principles of diagnosis and treatment*: Karger Medical and Scientific Publishers; 2015.
19. Boss R, Shapiro M. *Congenital heart disease*. Karger Publishers; 2015. p. 298-305.
20. Kon AA, Ackerson L, Lo B. How pediatricians counsel parents when no "best-choice" management exists: Lessons to be learned from hypoplastic left heart syndrome. *Archives of pediatrics & adolescent medicine*. 2004;158(5):436-41.
21. Byrne PJ, Murphy A. Informed consent and hypoplastic left heart syndrome. *Acta Paediatr*. 2005;94(9):1171-5.
22. Rocque R, Chipenda Dansokho S, Grad R, Witteman HO. What matters to patients and families: A content and process framework for clarifying preferences, concerns, and values. *Medical Decision Making*. 2020;40(6):722-34.
23. Stacey D, Légaré F, Lewis K, Barry MJ, Bennett CL, Eden KB, et al. Decision aids for people facing health treatment or screening decisions. *Cochrane Database of Systematic Reviews*. 2017(4).
24. Fagerlin A, Pignone M, Abhyankar P, Col N, Feldman-Stewart D, Gavaruzzi T, et al. Clarifying values: An updated review. *BMC Med Inform Decis Mak*. 2013;13(Suppl 2):S8-S.
25. Witteman HO, Scherer LD, Gavaruzzi T, Pieterse AH, Fuhrel-Forbis A, Chipenda Dansokho S, et al. Design features of explicit values clarification methods: A systematic review. *Med Decis Making*. 2016;36(4):453-71.
26. Witteman HO, Ndjaboue R, Vaisson G, Dansokho SC, Arnold B, Bridges JFP, et al. Clarifying values: An updated and expanded systematic review and meta-analysis. 2021.
27. Pinto NM, Patel, A., Delaney, R. K., Donofrio, M. T., Marino, B. S., Miller, S., Ozanne, E. M., Karasawa, M. H., Pershing, M. L., Zickmund, S. L., & Fagerlin, A. . Provider insights on shared decision making with families affected by congenital heart disease. 2021.
28. Delaney RK, Pinto, N., Patel, A., Ozanne, E., Marino, B. S., Donofrio, M. T., Miller, S. G., Andes, R., Young, J., & Fagerlin, A. Providers perceptions on counseling families with a neonate or fetus with severe congenital heart disease: A qualitative study. 42nd annual meeting and scientific sessions of the Society of Behavioral Medicine 2021.
29. Derogatis L. *Brief symptom inventory*. Baltimore, MD: Clinical Psychometric Research 1975.
30. Toedter LJ, Lasker JN, Alhadeff JM. The perinatal grief scale: Development and initial validation. *Am J Orthopsychiatry*. 1988;58(3):435-49.
31. Sepucha K, Ozanne E, Silvia K, Partridge A, Mulley AG, Jr. An approach to measuring the quality of breast cancer decisions. *Patient Educ Couns*. 2007;65(2):261-9.
32. Pinto NM, Weng C, Sheng X, Simon K, Byrne JB, Miller T, et al. Modifiers of stress related to timing of diagnosis in parents of children with complex congenital heart disease. *The Journal of Maternal-Fetal & Neonatal Medicine*. 2016;29(20):3340-6.
33. Cohen J. A power primer. *Psychol Bull*. 1992;112(1):155-9.
34. Zhang J, Quan H, Ng J, Stepanavage ME. Some statistical methods for multiple endpoints in clinical trials. *Control Clin Trials*. 1997;18(3):204-21.

- 1
- 2
- 3
- 4 35. Bender R, Lange S. Adjusting for multiple testing--when and how? *J Clin Epidemiol*. 2001;54(4):343-9.
- 5
- 6 36. Verbeke G, Molenberghs G. *Linear mixed models for longitudinal data*: Springer Science & Business Media; 2009.
- 7
- 8 37. Zou G. A modified poisson regression approach to prospective studies with binary data. *Am J Epidemiol*. 2004;159(7):702-6.
- 9
- 10 38. Little RJA, Rubin DB. The analysis of social science data with missing values. *Sociological Methods & Research*. 1989;18(2-3):292-326.
- 11
- 12 39. Schafer JL. Multiple imputation: A primer. *Statistical Methods in Medical Research*. 1999;8(1):3-15.
- 13
- 14 40. Charles C, Gafni A, Whelan T. Shared decision-making in the medical encounter: What does it mean? (or it takes at least two to tango). *Social Science & Medicine*. 1997;44(5):681-92.
- 15
- 16 41. Ware J, Jr., Kosinski M, Keller SD. A 12-item short-form health survey: Construction of scales and preliminary tests of reliability and validity. *Med Care*. 1996;34(3):220-33.
- 17
- 18 42. Mazer P, Gischler SJ, Koot HM, Tibboel D, van Dijk M, Duivenvoorden HJ. Impact of a child with congenital anomalies on parents (iccap) questionnaire; a psychometric analysis. *Health and quality of life outcomes*. 2008;6:102-.
- 19
- 20 43. Degner LF, Sloan JA. Decision making during serious illness: What role do patients really want to play? *Journal of Clinical Epidemiology*. 1992;45(9):941-50.
- 21
- 22 44. Bennett C, Graham ID, Kristjansson E, Kearing SA, Clay KF, O'Connor AM. Validation of a preparation for decision making scale. *Patient Educ Couns*. 2010;78(1):130-3.
- 23
- 24 45. O'Connor A. Decision self-efficacy scale 1995.
- 25
- 26 46. O'Connor A. Validation of a decisional conflict scale. *Medical decision making*. 1995;15(1):25-30.
- 27
- 28 47. Brehaut JC, O'Connor AM, Wood TJ, Hack TF, Siminoff L, Gordon E, et al. Validation of a decision regret scale. *Medical Decision Making*. 2003;23(4):281-92.
- 29
- 30 48. Edwards A, Elwyn G, Hood K, Robling M, Atwell C, Holmes-Rovner M, et al. The development of comrade--a patient-based outcome measure to evaluate the effectiveness of risk communication and treatment decision making in consultations. *Patient Educ Couns*. 2003;50(3):311-22.
- 31
- 32 49. Bekker HL, Hewison J, Thornton JG. Applying decision analysis to facilitate informed decision making about prenatal diagnosis for down syndrome: A randomised controlled trial. *Prenatal Diagnosis*. 2004;24(4):265-75.
- 33
- 34 50. Chew LD, Bradley KA, Boyko EJ. Brief questions to identify patients with inadequate health literacy. *Family Medicine*. 2004;36(8):588-94.
- 35
- 36 51. Fagerlin A, Zikmund-Fisher BJ, Ubel PA, Jankovic A, Derry HA, Smith DM. Measuring numeracy without a math test: Development of the subjective numeracy scale. *Medical Decision Making*. 2007;27(5):672-80.
- 37
- 38 52. Koenig HG, Büssing A. The duke university religion index (durel): A five-item measure for use in epidemiological studies. *Religions*. 2010;1(1):78-85.
- 39
- 40
- 41
- 42
- 43
- 44
- 45
- 46
- 47
- 48
- 49
- 50
- 51
- 52
- 53
- 54
- 55
- 56
- 57
- 58
- 59



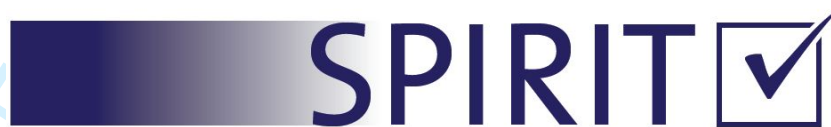

STANDARD PROTOCOL ITEMS: RECOMMENDATIONS FOR INTERVENTIONAL TRIALS

SPIRIT 2013 Checklist: Recommended items to address in a clinical trial protocol and related documents\*

| Section/item                      | ItemNo | Description                                                                                                  | Page in manuscript |
|-----------------------------------|--------|--------------------------------------------------------------------------------------------------------------|--------------------|
| <b>Administrative information</b> |        |                                                                                                              |                    |
| Title                             | 1      | Descriptive title identifying the study design, population, interventions, and, if applicable, trial acronym | 1                  |
| Trial registration                | 2a     | Trial identifier and registry name. If not yet registered, name of intended registry                         | 1                  |

|                            |    |                                                                                                                                                                                                                                                                                          |     |
|----------------------------|----|------------------------------------------------------------------------------------------------------------------------------------------------------------------------------------------------------------------------------------------------------------------------------------------|-----|
|                            | 2b | All items from the World Health Organization Trial Registration Data Set                                                                                                                                                                                                                 | N/A |
| Protocol version           | 3  | Date and version identifier                                                                                                                                                                                                                                                              | N/A |
| Funding                    | 4  | Sources and types of financial, material, and other support                                                                                                                                                                                                                              | 1   |
| Roles and responsibilities | 5a | Names, affiliations, and roles of protocol contributors                                                                                                                                                                                                                                  | 1   |
|                            | 5b | Name and contact information for the trial sponsor                                                                                                                                                                                                                                       | 1   |
|                            | 5c | Role of study sponsor and funders, if any, in study design; collection, management, analysis, and interpretation of data; writing of the report; and the decision to submit the report for publication, including whether they will have ultimate authority over any of these activities | N/A |

|                          |    |                                                                                                                                                                                                                                                                  |     |
|--------------------------|----|------------------------------------------------------------------------------------------------------------------------------------------------------------------------------------------------------------------------------------------------------------------|-----|
|                          | 5d | Composition, roles, and responsibilities of the coordinating centre, steering committee, endpoint adjudication committee, data management team, and other individuals or groups overseeing the trial, if applicable (see Item 21a for data monitoring committee) | N/A |
| <b>Introduction</b>      |    |                                                                                                                                                                                                                                                                  |     |
| Background and rationale | 6a | Description of research question and justification for undertaking the trial, including summary of relevant studies (published and unpublished) examining benefits and harms for each intervention                                                               | 4   |
|                          | 6b | Explanation for choice of comparators                                                                                                                                                                                                                            | 10  |
| Objectives               | 7  | Specific objectives or hypotheses                                                                                                                                                                                                                                | 5   |

|                                                           |    |                                                                                                                                                                                                           |   |
|-----------------------------------------------------------|----|-----------------------------------------------------------------------------------------------------------------------------------------------------------------------------------------------------------|---|
| Trial design                                              | 8  | Description of trial design including type of trial (eg, parallel group, crossover, factorial, single group), allocation ratio, and framework (eg, superiority, equivalence, noninferiority, exploratory) | 6 |
| <b>Methods: Participants, interventions, and outcomes</b> |    |                                                                                                                                                                                                           |   |
| Study setting                                             | 9  | Description of study settings (eg, community clinic, academic hospital) and list of countries where data will be collected. Reference to where list of study sites can be obtained                        | 6 |
| Eligibility criteria                                      | 10 | Inclusion and exclusion criteria for participants. If applicable, eligibility criteria for study centres and individuals who will perform the interventions (eg, surgeons, psychotherapists)              | 6 |

|               |     |                                                                                                                                                                                                |     |
|---------------|-----|------------------------------------------------------------------------------------------------------------------------------------------------------------------------------------------------|-----|
| Interventions | 11a | Interventions for each group with sufficient detail to allow replication, including how and when they will be administered                                                                     | 8   |
|               | 11b | Criteria for discontinuing or modifying allocated interventions for a given trial participant (eg, drug dose change in response to harms, participant request, or improving/worsening disease) | N/A |
|               | 11c | Strategies to improve adherence to intervention protocols, and any procedures for monitoring adherence (eg, drug tablet return, laboratory tests)                                              | 13  |
|               | 11d | Relevant concomitant care and interventions that are permitted or prohibited during the trial                                                                                                  | N/A |

|                      |    |                                                                                                                                                                                                                                                                                                                                                                                |    |
|----------------------|----|--------------------------------------------------------------------------------------------------------------------------------------------------------------------------------------------------------------------------------------------------------------------------------------------------------------------------------------------------------------------------------|----|
| Outcomes             | 12 | Primary, secondary, and other outcomes, including the specific measurement variable (eg, systolic blood pressure), analysis metric (eg, change from baseline, final value, time to event), method of aggregation (eg, median, proportion), and time point for each outcome. Explanation of the clinical relevance of chosen efficacy and harm outcomes is strongly recommended | 10 |
| Participant timeline | 13 | Time schedule of enrolment, interventions (including any run-ins and washouts), assessments, and visits for participants. A schematic diagram is highly recommended (see Figure)                                                                                                                                                                                               | 26 |
| Sample size          | 14 | Estimated number of participants needed to achieve study objectives and how it was determined, including clinical and statistical assumptions supporting any sample size calculations                                                                                                                                                                                          | 10 |

|    |                                                                     |     |                                                                                                                                                                                                                                                                                                                                                          |
|----|---------------------------------------------------------------------|-----|----------------------------------------------------------------------------------------------------------------------------------------------------------------------------------------------------------------------------------------------------------------------------------------------------------------------------------------------------------|
| 1  |                                                                     |     |                                                                                                                                                                                                                                                                                                                                                          |
| 2  |                                                                     |     |                                                                                                                                                                                                                                                                                                                                                          |
| 3  |                                                                     |     |                                                                                                                                                                                                                                                                                                                                                          |
| 4  | Recruitment                                                         | 15  | Strategies for achieving adequate participant enrolment to reach target sample size                                                                                                                                                                                                                                                                      |
| 5  |                                                                     |     |                                                                                                                                                                                                                                                                                                                                                          |
| 6  |                                                                     |     |                                                                                                                                                                                                                                                                                                                                                          |
| 7  | <b>Methods: Assignment of interventions (for controlled trials)</b> |     |                                                                                                                                                                                                                                                                                                                                                          |
| 8  |                                                                     |     |                                                                                                                                                                                                                                                                                                                                                          |
| 9  | Allocation:                                                         |     |                                                                                                                                                                                                                                                                                                                                                          |
| 10 |                                                                     |     |                                                                                                                                                                                                                                                                                                                                                          |
| 11 | Sequence generation                                                 | 16a | Method of generating the allocation sequence (eg, computer-generated random numbers), and list of any factors for stratification. To reduce predictability of a random sequence, details of any planned restriction (eg, blocking) should be provided in a separate document that is unavailable to those who enrol participants or assign interventions |
| 12 |                                                                     |     |                                                                                                                                                                                                                                                                                                                                                          |
| 13 |                                                                     |     |                                                                                                                                                                                                                                                                                                                                                          |
| 14 |                                                                     |     |                                                                                                                                                                                                                                                                                                                                                          |
| 15 |                                                                     |     |                                                                                                                                                                                                                                                                                                                                                          |
| 16 |                                                                     |     |                                                                                                                                                                                                                                                                                                                                                          |
| 17 |                                                                     |     |                                                                                                                                                                                                                                                                                                                                                          |
| 18 |                                                                     |     |                                                                                                                                                                                                                                                                                                                                                          |
| 19 |                                                                     |     |                                                                                                                                                                                                                                                                                                                                                          |
| 20 |                                                                     |     |                                                                                                                                                                                                                                                                                                                                                          |
| 21 |                                                                     |     |                                                                                                                                                                                                                                                                                                                                                          |
| 22 |                                                                     |     |                                                                                                                                                                                                                                                                                                                                                          |
| 23 |                                                                     |     |                                                                                                                                                                                                                                                                                                                                                          |
| 24 |                                                                     |     |                                                                                                                                                                                                                                                                                                                                                          |
| 25 |                                                                     |     |                                                                                                                                                                                                                                                                                                                                                          |
| 26 |                                                                     |     |                                                                                                                                                                                                                                                                                                                                                          |
| 27 |                                                                     |     |                                                                                                                                                                                                                                                                                                                                                          |
| 28 |                                                                     |     |                                                                                                                                                                                                                                                                                                                                                          |
| 29 |                                                                     |     |                                                                                                                                                                                                                                                                                                                                                          |
| 30 |                                                                     |     |                                                                                                                                                                                                                                                                                                                                                          |
| 31 |                                                                     |     |                                                                                                                                                                                                                                                                                                                                                          |

|                                                           |     |                                                                                                                                                                                                           |     |
|-----------------------------------------------------------|-----|-----------------------------------------------------------------------------------------------------------------------------------------------------------------------------------------------------------|-----|
| Allocation concealment mechanism                          | 16b | Mechanism of implementing the allocation sequence (eg, central telephone; sequentially numbered, opaque, sealed envelopes), describing any steps to conceal the sequence until interventions are assigned | 7   |
| Implementation                                            | 16c | Who will generate the allocation sequence, who will enrol participants, and who will assign participants to interventions                                                                                 | 7   |
| Blinding (masking)                                        | 17a | Who will be blinded after assignment to interventions (eg, trial participants, care providers, outcome assessors, data analysts), and how                                                                 | 7   |
|                                                           | 17b | If blinded, circumstances under which unblinding is permissible, and procedure for revealing a participant's allocated intervention during the trial                                                      | N/A |
| <b>Methods: Data collection, management, and analysis</b> |     |                                                                                                                                                                                                           |     |



|                         |     |                                                                                                                                                                                                                                                                                                                                                                                                              |    |
|-------------------------|-----|--------------------------------------------------------------------------------------------------------------------------------------------------------------------------------------------------------------------------------------------------------------------------------------------------------------------------------------------------------------------------------------------------------------|----|
| Data collection methods | 18a | Plans for assessment and collection of outcome, baseline, and other trial data, including any related processes to promote data quality (eg, duplicate measurements, training of assessors) and a description of study instruments (eg, questionnaires, laboratory tests) along with their reliability and validity, if known. Reference to where data collection forms can be found, if not in the protocol | 11 |
|                         | 18b | Plans to promote participant retention and complete follow-up, including list of any outcome data to be collected for participants who discontinue or deviate from intervention protocols                                                                                                                                                                                                                    | 12 |

|                                                 |                     |     |                                                                                                                                                                                                                                                                   |     |
|-------------------------------------------------|---------------------|-----|-------------------------------------------------------------------------------------------------------------------------------------------------------------------------------------------------------------------------------------------------------------------|-----|
| 1<br>2<br>3<br>4<br>5<br>6<br>7<br>8<br>9<br>10 | Data management     | 19  | Plans for data entry, coding, security, and storage, including any related processes to promote data quality (eg, double data entry; range checks for data values). Reference to where details of data management procedures can be found, if not in the protocol | 12  |
| 11<br>12<br>13<br>14<br>15<br>16                | Statistical methods | 20a | Statistical methods for analysing primary and secondary outcomes. Reference to where other details of the statistical analysis plan can be found, if not in the protocol                                                                                          | 13  |
| 17<br>18<br>19<br>20                            |                     | 20b | Methods for any additional analyses (eg, subgroup and adjusted analyses)                                                                                                                                                                                          | N/A |

1  
2  
3  
4  
5  
6  
7  
8  
9  
10  
11  
12  
13  
14  
15  
16  
17  
18  
19  
20  
21  
22  
23  
24  
25  
26  
27  
28  
29  
30  
31

|                            |     |                                                                                                                                                                                                                                                                                                                                       |     |
|----------------------------|-----|---------------------------------------------------------------------------------------------------------------------------------------------------------------------------------------------------------------------------------------------------------------------------------------------------------------------------------------|-----|
|                            | 20c | Definition of analysis population relating to protocol non-adherence (eg, as randomised analysis), and any statistical methods to handle missing data (eg, multiple imputation)                                                                                                                                                       | 16  |
| <b>Methods: Monitoring</b> |     |                                                                                                                                                                                                                                                                                                                                       |     |
| Data monitoring            | 21a | Composition of data monitoring committee (DMC); summary of its role and reporting structure; statement of whether it is independent from the sponsor and competing interests; and reference to where further details about its charter can be found, if not in the protocol. Alternatively, an explanation of why a DMC is not needed | N/A |

|                                 |     |                                                                                                                                                                                   |     |
|---------------------------------|-----|-----------------------------------------------------------------------------------------------------------------------------------------------------------------------------------|-----|
|                                 | 21b | Description of any interim analyses and stopping guidelines, including who will have access to these interim results and make the final decision to terminate the trial           | N/A |
| Harms                           | 22  | Plans for collecting, assessing, reporting, and managing solicited and spontaneously reported adverse events and other unintended effects of trial interventions or trial conduct | 13  |
| Auditing                        | 23  | Frequency and procedures for auditing trial conduct, if any, and whether the process will be independent from investigators and the sponsor                                       | N/A |
| <b>Ethics and dissemination</b> |     |                                                                                                                                                                                   |     |
| Research ethics approval        | 24  | Plans for seeking research ethics committee/institutional review board (REC/IRB) approval                                                                                         | 16  |

|                     |     |                                                                                                                                                                                                                                  |       |
|---------------------|-----|----------------------------------------------------------------------------------------------------------------------------------------------------------------------------------------------------------------------------------|-------|
| Protocol amendments | 25  | Plans for communicating important protocol modifications (eg, changes to eligibility criteria, outcomes, analyses) to relevant parties (eg, investigators, REC/IRBs, trial participants, trial registries, journals, regulators) | 16-17 |
| Consent or assent   | 26a | Who will obtain informed consent or assent from potential trial participants or authorised surrogates, and how (see Item 32)                                                                                                     | 17    |
|                     | 26b | Additional consent provisions for collection and use of participant data and biological specimens in ancillary studies, if applicable                                                                                            | N/A   |
| Confidentiality     | 27  | How personal information about potential and enrolled participants will be collected, shared, and maintained in order to protect confidentiality before, during, and after the trial                                             | 17    |

|                               |     |                                                                                                                                                                                                                                                                                     |     |
|-------------------------------|-----|-------------------------------------------------------------------------------------------------------------------------------------------------------------------------------------------------------------------------------------------------------------------------------------|-----|
| Declaration of interests      | 28  | Financial and other competing interests for principal investigators for the overall trial and each study site                                                                                                                                                                       | 1   |
| Access to data                | 29  | Statement of who will have access to the final trial dataset, and disclosure of contractual agreements that limit such access for investigators                                                                                                                                     | 17  |
| Ancillary and post-trial care | 30  | Provisions, if any, for ancillary and post-trial care, and for compensation to those who suffer harm from trial participation                                                                                                                                                       | N/A |
| Dissemination policy          | 31a | Plans for investigators and sponsor to communicate trial results to participants, healthcare professionals, the public, and other relevant groups (eg, via publication, reporting in results databases, or other data sharing arrangements), including any publication restrictions | 17  |

|                            |     |                                                                                                                                                                                                |     |
|----------------------------|-----|------------------------------------------------------------------------------------------------------------------------------------------------------------------------------------------------|-----|
|                            | 31b | Authorship eligibility guidelines and any intended use of professional writers                                                                                                                 | N/A |
|                            | 31c | Plans, if any, for granting public access to the full protocol, participant-level dataset, and statistical code                                                                                | N/A |
| <b>Appendices</b>          |     |                                                                                                                                                                                                |     |
| Informed consent materials | 32  | Model consent form and other related documentation given to participants and authorised surrogates                                                                                             | N/A |
| Biological specimens       | 33  | Plans for collection, laboratory evaluation, and storage of biological specimens for genetic or molecular analysis in the current trial and for future use in ancillary studies, if applicable | N/A |

\*It is strongly recommended that this checklist be read in conjunction with the SPIRIT 2013 Explanation & Elaboration for important clarification on the items. Amendments to the protocol

1  
2  
3 should be tracked and dated. The SPIRIT checklist is copyrighted by the SPIRIT Group under the  
4 Creative Commons "[Attribution-NonCommercial-NoDerivs 3.0 Unported](#)" license.  
5  
6  
7  
8  
9  
10  
11  
12  
13  
14  
15  
16  
17  
18  
19  
20  
21  
22  
23  
24  
25  
26  
27  
28  
29  
30  
31



# BMJ Open

## A Study Protocol for a Randomized Clinical Trial of a Decision Aid and Values Clarification Method for Parents of a Fetus or Neonate Diagnosed with a Life-Threatening Congenital Heart Defect

|                                 |                                                                                                                                                                                                                                                                                                                                                                                                                                                                                                                                                                                                                                                                                                                                                                                                                                                                                                                                 |
|---------------------------------|---------------------------------------------------------------------------------------------------------------------------------------------------------------------------------------------------------------------------------------------------------------------------------------------------------------------------------------------------------------------------------------------------------------------------------------------------------------------------------------------------------------------------------------------------------------------------------------------------------------------------------------------------------------------------------------------------------------------------------------------------------------------------------------------------------------------------------------------------------------------------------------------------------------------------------|
| Journal:                        | <i>BMJ Open</i>                                                                                                                                                                                                                                                                                                                                                                                                                                                                                                                                                                                                                                                                                                                                                                                                                                                                                                                 |
| Manuscript ID                   | bmjopen-2021-055455.R1                                                                                                                                                                                                                                                                                                                                                                                                                                                                                                                                                                                                                                                                                                                                                                                                                                                                                                          |
| Article Type:                   | Protocol                                                                                                                                                                                                                                                                                                                                                                                                                                                                                                                                                                                                                                                                                                                                                                                                                                                                                                                        |
| Date Submitted by the Author:   | 18-Oct-2021                                                                                                                                                                                                                                                                                                                                                                                                                                                                                                                                                                                                                                                                                                                                                                                                                                                                                                                     |
| Complete List of Authors:       | Delaney, Rebecca; The University of Utah School of Medicine<br>Pinto, Nelangi; University of Utah Health, Pediatrics<br>Ozanne, Elissa; The University of Utah School of Medicine, Population Health Sciences<br>Stark, Louisa; University of Utah School of Medicine, Human Genetics<br>Pershing, Mandy; University of Utah School of Medicine, Population Health Sciences<br>Thorpe, Alistair; University of Utah School of Medicine, Population Health Sciences<br>Witteman, Holly; Laval University, Family and Emergency Medicine<br>Thokala, Praveen; The University of Sheffield, School of Health and Related Research (SchARR)<br>Lambert, Linda; University of Utah Health, Pediatrics<br>Hansen, Lisa; University of Utah Health, Pediatrics<br>Greene, Tom; The University of Utah School of Medicine, Population Health Sciences<br>Fagerlin, A; University of Utah School of Medicine, Population Health Sciences |
| <b>Primary Subject Heading</b>: | Paediatrics                                                                                                                                                                                                                                                                                                                                                                                                                                                                                                                                                                                                                                                                                                                                                                                                                                                                                                                     |
| Secondary Subject Heading:      | Cardiovascular medicine                                                                                                                                                                                                                                                                                                                                                                                                                                                                                                                                                                                                                                                                                                                                                                                                                                                                                                         |
| Keywords:                       | Congenital heart disease < CARDIOLOGY, Paediatric cardiology < CARDIOLOGY, Paediatric cardiology < PAEDIATRICS                                                                                                                                                                                                                                                                                                                                                                                                                                                                                                                                                                                                                                                                                                                                                                                                                  |
|                                 |                                                                                                                                                                                                                                                                                                                                                                                                                                                                                                                                                                                                                                                                                                                                                                                                                                                                                                                                 |

SCHOLARONE™  
Manuscripts



I, the Submitting Author has the right to grant and does grant on behalf of all authors of the Work (as defined in the below author licence), an exclusive licence and/or a non-exclusive licence for contributions from authors who are: i) UK Crown employees; ii) where BMJ has agreed a CC-BY licence shall apply, and/or iii) in accordance with the terms applicable for US Federal Government officers or employees acting as part of their official duties; on a worldwide, perpetual, irrevocable, royalty-free basis to BMJ Publishing Group Ltd ("BMJ") its licensees and where the relevant Journal is co-owned by BMJ to the co-owners of the Journal, to publish the Work in this journal and any other BMJ products and to exploit all rights, as set out in our [licence](#).

The Submitting Author accepts and understands that any supply made under these terms is made by BMJ to the Submitting Author unless you are acting as an employee on behalf of your employer or a postgraduate student of an affiliated institution which is paying any applicable article publishing charge ("APC") for Open Access articles. Where the Submitting Author wishes to make the Work available on an Open Access basis (and intends to pay the relevant APC), the terms of reuse of such Open Access shall be governed by a Creative Commons licence – details of these licences and which [Creative Commons](#) licence will apply to this Work are set out in our licence referred to above.

Other than as permitted in any relevant BMJ Author's Self Archiving Policies, I confirm this Work has not been accepted for publication elsewhere, is not being considered for publication elsewhere and does not duplicate material already published. I confirm all authors consent to publication of this Work and authorise the granting of this licence.

1  
2  
3 1 A Study Protocol for a Randomized Clinical Trial of a Decision Aid and Values Clarification  
4 2 Method for Parents of a Fetus or Neonate Diagnosed with a Life-Threatening Congenital Heart  
5 3 Defect  
6

7  
8 4 Rebecca K. Delaney<sup>a</sup>; Nelangi M. Pinto<sup>b</sup>; Elissa M. Ozanne<sup>a</sup>; Louisa A. Stark<sup>c,d</sup>; Mandy L.  
9 5 Pershing<sup>a</sup>; Alistair Thorpe<sup>a</sup>; Holly O. Witteman<sup>e</sup>; Praveen Thokala<sup>f</sup>; Linda M. Lambert<sup>b</sup>, Lisa M.  
10 6 Hansen<sup>b</sup>, Tom H. Greene<sup>a</sup>; & Angela Fagerlin<sup>a,i</sup>

11 7 **Affiliations:** <sup>a</sup>Department of Population Health Sciences, University of Utah, Salt Lake City,  
12 8 UT; <sup>b</sup>Division of Pediatric Cardiology, Department of Pediatrics, University of Utah, Salt Lake  
13 9 City, UT; <sup>c</sup> Clinical and Translational Science Institute, University of Utah, Salt Lake City, UT;  
14 10 <sup>d</sup>Department of Human Genetics, University of Utah, Salt Lake City, UT; <sup>e</sup>Department of Family  
15 11 and Emergency Medicine, Laval University, Quebec City, Canada; <sup>f</sup> School of Health and  
16 12 Related Research (SchARR), University of Sheffield, Sheffield, UK; <sup>i</sup>VA HSR&D Informatics,  
17 13 Decision-Enhancement and Analytic Sciences Center, VA Salt Lake City Health Care System,  
18 14 Salt Lake City, UT

19 15 **Address correspondence to:** Dr. Angela Fagerlin, Department of Population Health Sciences,  
20 16 University of Utah, 295 Chipeta Way, Salt Lake City, UT, 84108, [angie.fagerlin@hsc.utah.edu],  
21 17 (801) 587-0049  
22  
23  
24  
25  
26

27 19 **Contributorship Statement:** All authors have contributed to the design of this protocol. RD,  
28 20 NP, EO, LS, HW, PT, and AF initiated and conceptually designed the project. MP, LH, LL, and  
29 21 NP are acquiring data. The protocol was drafted by RD and MP and was refined by for critically  
30 22 important content by RD, AT, NP, EO, MP, LS, LH, LL, HW, PT, and AF. Statistical advice was  
31 23 provided by TG. AF obtained funding for the study. All authors contributed to the manuscript  
32 24 and read and approved the final manuscript.  
33  
34  
35

36 26 Trial registration: NCT04437069  
37

38 27 **Funding:** This research was supported by the American Heart Association's Children's  
39 28 Strategically Focused Research Network grant (17SFRN33660465) to Dr. Fagerlin. Dr.  
40 29 Delaney's effort on this research was supported by the National Institutes of Health under Ruth L.  
41 30 Kirschstein National Research Service Award T32HL007576 from the National Heart, Lung, and  
42 31 Blood Institute. Holly O. Witteman is supported by a Canada Research Chair (Tier 2) in Human-  
43 32 Centred Digital Health.  
44  
45

46 33 **Conflict of Interest Disclosures:** The authors have no conflicts of interest to disclose.  
47  
48  
49  
50  
51  
52  
53  
54  
55  
56  
57  
58  
59  
60

## Abstract

**Introduction:** Parents who receive the diagnosis of a life-threatening, complex heart defect in their fetus or neonate face a difficult choice between pursuing termination (for fetal diagnoses), palliative care, or complex surgical interventions. Shared decision making (SDM) is recommended in clinical contexts where there is clinical equipoise. SDM can be facilitated by decision aids. The International Patient Decision Aids Standards collaboration recommends the inclusion of values clarification methods (VCMs), yet little evidence exists concerning the incremental impact of VCMs on patient or surrogate decision making. This protocol describes a randomized clinical trial to evaluate the effect of a decision aid (with and without a VCM) on parental mental health and decision making within a clinical encounter.

**Methods and Analysis:** Parents who have a fetus or neonate diagnosed with one of six complex congenital heart defects at a single tertiary center will be recruited. Data collection for the prospective observational control group was conducted September 2018 to December 2020 (N=35) and data collection for two intervention groups is ongoing (began October 2020). At least 100 participants will be randomized 1:1 to two intervention groups (decision aid only vs. decision aid with VCM). For the intervention groups, data will be collected at four time points: 1) at diagnosis, 2) post-receipt of decision aid, 3) post-decision, and 4) 3-months post-decision. Data collection for the control group was the same, except they did not receive a survey at Time 2. Linear mixed effects models will assess differences between study arms in distress (primary outcome), grief, and decision quality (secondary outcomes) at 3-months post-treatment decision.

**Ethics and Dissemination:** This study was approved by the University of Utah Institutional Review Board and the protocol is published on ClinicalTrials.gov (NCT04437069). Study findings have and will continue to be presented at national conferences and within scientific research journals.

1

2

### 3 **Strengths and limitations of this study:**

- 4 • One study strength is that this is a randomized clinical trial design with clinically
- 5 relevant, validated outcome measures.
- 6 • A second strength is that this study will add to the limited literature on the effectiveness
- 7 of value clarification methods in real-world clinical contexts.
- 8 • Given that the study takes place at one tertiary center, there is potential limitation of
- 9 decreased diversity of the sample, a small sample size, and reduced power for analyses.

# 1 Introduction

## 2 *Background and rationale*

3 Congenital heart disease occurs for about 40,000 live births per year; of these, about 2-3% are  
4 life-threatening congenital heart defects (CHDs).<sup>1-3</sup> Even with early intervention those diagnosed  
5 with life-threatening CHDs have frequent readmissions, require additional interventions and  
6 typically face a shortened life span.<sup>4</sup> A diagnosis of a severe, life-threatening CHD in a fetus or  
7 neonate is an unexpected and emotionally distressful event for parents who must then decide  
8 between termination (when diagnosed prenatally), palliative care, or surgery.<sup>5-8</sup> Parents  
9 experience significant grief,<sup>9,10</sup> distress, depression, and anxiety<sup>11-13</sup> surrounding this difficult  
10 decision, which can compromise their mental health.<sup>14-16</sup>

11  
12 Shared decision making (SDM) is an approach for supporting patient engagement with clinicians  
13 that is particularly useful for contexts, such as life-threatening CHD, which involve clinical  
14 equipoise and value-laden, complex decisions.<sup>17-21</sup> Decision aids are tools that improve the SDM  
15 process and include information on treatment options that are evidence based, balanced, and help  
16 people clarify their values.<sup>4,22</sup> Decision aids increase patients' knowledge, and engagement  
17 related to the diagnosis and treatment decision making. In addition, studies have found greater  
18 concordance between patients' preferences and treatment received, improved patient-provider  
19 communication, and reduced uncertainty and decisional conflict in those receiving decision  
20 aids.<sup>23</sup>

21  
22 The International Patient Decision Aids Standards (IPDAS) Collaboration developed criteria for  
23 a well-designed decision aid.<sup>24</sup> Values clarification methods (i.e., processes that aid patients in

1 clarifying their values and goals in order to improve alignment between their preferences and  
2 their treatments) were included as a critical component. Although some studies have found  
3 positive effects of value clarification methods on decision outcomes, there are few rigorous  
4 studies in real-world clinical contexts that evaluate whether value clarification methods improve  
5 key outcomes, prompting calls for additional research.<sup>24-26</sup>

### 7 *Objectives & Hypothesis*

8 The main objective of the study is to evaluate the effect of a decision aid with and without a  
9 values clarification method on longitudinal parent mental and physical health, decision-making,  
10 and clinical encounter outcomes (e.g., quality of clinician consultation and risk communication).  
11 Since no prior data on decision aid use in CHD exist, we will also compare parents who receive  
12 the decision aid to parents who do not (prospective observational control group enrolled during  
13 decision aid development) on the aforementioned outcomes.

15 We hypothesize that participants who receive the decision aid with the values clarification  
16 method will report less distress (primary outcome), reduced grief, and better decision quality  
17 (secondary outcomes) relative to participants who receive the decision aid only across 3-months  
18 post-treatment decision. We also hypothesize that participants who receive the decision aid with  
19 or without the values clarification method will report reduced distress, grief, and better decision  
20 quality relative to participants who are in the prospective observational control group.

21 We will also test the impact of the decision aid with a values clarification method on several  
22 exploratory measures (e.g. self-efficacy, satisfaction, and decision regret).

23

## 1 **Methods**

### 2 *Study Design*

3 This is a randomized clinical trial examining the effectiveness of a decision aid and values  
4 clarification method. There are two intervention groups and one prospective observational  
5 control group. Data collection for the prospective observational control group was conducted  
6 September 2018 – December 2020 (N= 35) and data collection for the intervention groups (the  
7 primary analytic sample) began October 2020 and is ongoing. The flow of the study is outlined  
8 in Figure 1.

### 9 *Study Setting*

10 This is a single site study at a children's hospital in the Intermountain West. Physicians at this  
11 hospital perform >650 fetal echocardiograms with about 125 new complex CHD diagnoses  
12 annually.

### 13 *Participants and Eligibility Criteria*

14 To be eligible for the study, parents must be 18+ who have a fetus or neonate diagnosed with a  
15 complex, life-threatening CHD (whether prenatally or postnatally). While the decision aid was  
16 being developed, the control group was recruited with these guidelines. The decision aid was  
17 developed to provide information on the following six CHD diagnoses: truncus arteriosus with  
18 greater than moderate truncal valve regurgitation, pulmonary atresia with intact ventricular  
19 septum with a severely hypoplastic right ventricle that will require single ventricle palliation,  
20 complex single ventricle, complex single ventricle with heterotaxy, hypoplastic left heart  
21 syndrome (HLHS), and Ebstein anomaly of the tricuspid valve with greater than moderate  
22 regurgitation. These diagnoses were chosen as they were deemed preference sensitive in that  
23 surgical intervention, palliative care, and termination were all medically reasonable treatment



1 options by expert consensus. Thus, in order to be eligible for one of the two intervention groups,  
2 the fetus/neonate must be diagnosed with one of the six aforementioned diagnoses.

### 3 *Recruitment and Consent*

4 When a fetus/neonate is diagnosed with a qualifying CHD, a pediatric cardiologist will evaluate  
5 the diagnosis to confirm eligibility for the study. Patients consult with a clinician immediately  
6 after the diagnosis. Then, they are approached by research staff for study participation. When an  
7 eligible fetus/neonate is identified, the parent(s) will be approached by the study team and  
8 invited to participate in the study. One or both parents may participate. Interested participants  
9 receive a link to complete the informed consent through an electronic data capture (REDCap). If  
10 both parents consent to participation, they will receive separate links to complete their own  
11 informed consent and surveys. For the intervention groups, the decision aid is initiated by the  
12 parent, independent of the provider or coordinator. Both the control and intervention groups  
13 consult with clinicians as they decide which treatment to pursue.

### 14 *Randomization*

15 Participants will be randomized using REDCap (HIPAA-compliant remote data capture system)  
16 into one of two intervention groups, described below, after completing the baseline survey.  
17 Participants will not be explicitly told which group they were randomized to. Both intervention  
18 groups will receive the same decision aid, but one arm will receive a values clarification method  
19 integrated within the decision aid, while the other group will get the decision aid without the  
20 values clarification method. The decision aid is an app on an Amazon Fire tablet, which is either  
21 given to the parent(s) in clinic if they complete the baseline survey and consent in person, or is  
22 mailed to their home if they complete the consent outside of clinic. The tablet remains in their

1 possession for the duration of the study so that they can consult the decision aid as often as they  
2 would like.

### 3 **Development of Decision Aid and Values Clarification Method**

4 We used data from focus groups of parents who had a fetus/neonate diagnosed with a complex  
5 CHD, as well as semi-structured interviews with family and provider stakeholders to identify  
6 important content to include in the digital decision aid.<sup>27,28</sup> The tool was developed through an  
7 iterative process of content drafting by the development team followed by multiple rounds of  
8 content review and revision with the research team, parent partners, and healthcare providers in  
9 relevant fields (e.g., pediatric cardiologists, surgeons, social workers, palliative care experts).

10 The team gathered stories about parents' experiences during several individual and group  
11 interviews.

12 The research team also developed a values clarification method. We began by examining  
13 qualitative data from the focus group and interviews related to factors influencing parents'  
14 choices and identifying key elements that had influenced parents' decision. The team then  
15 engaged in multiple workshop sessions, discussing how best to describe components of each  
16 value, with parent partners providing input on draft versions of these descriptions. The values  
17 clarification method interface was developed through an iterative process of creating alpha  
18 versions, testing, and revision.

### 19 **Patient and Public Involvement**

20 Three parents (two females and one male) whose children were diagnosed with complex CHD  
21 were invited to serve as parent collaborators. Discussions with these parents informed the design  
22 and development of the decision aid, outcome measures that were chosen, and methods of  
23 recruitment for the study.

## 1 **Interventions and Comparators**

### 2 ***Prospective Observational Control Group***

3 Participants in the prospective observational control group did not receive the decision aid or  
4 values clarification method. Participants were enrolled during the development of the decision  
5 aid to prevent contamination by providers or other families exposed to the decision aid.  
6 Participants received standard clinical care.

### 7 ***Decision Aid***

8 The intervention group receives a decision aid after diagnosis and then continues with standard  
9 care. The decision aid includes eight sections, which are broadly described in Table 1. Section 5  
10 is individualized to each participant to show information specific to their fetus/neonate's  
11 diagnosis. Participants are given the decision aid, which is an app that is loaded onto an Amazon  
12 Fire tablet (one per family).

### 13 ***Values Clarification Method***

14 The Values Clarification Method is designed to help participants clarify the choice that feels  
15 better for them and their family. For those randomized to receive the values clarification method,  
16 the decision aid includes an extra module, *What Matters Most to You*. The goal of this exercise  
17 is to help participants think through some short- and long-term consequences of their decision.  
18 When faced with a life-threatening diagnosis, there are many consequences to consider, and  
19 participants may not know how they feel about each of them or how to weigh them by  
20 importance or value. To begin, participants choose two of the possible treatment decision options  
21 (surgery, comfort care, and ending the pregnancy) and compare them in 10 different topic areas.  
22 Some examples of the topics are: time in the hospital, the risk that the child will have  
23 impairments, financial issues, and life in adulthood. The purpose of choosing two potential

1 decisions at a time is to put them on a clear spectrum in a preference scale, as weighting all three  
2  
3 at once would be too complicated in terms of determining weights. For each topic, there is a  
4  
5 sliding scale between the two choices where they drag the slider to show how much they prefer  
6  
7 one choice over another. At the end, they are shown a summary of which choice they preferred  
8  
9 for each category. Participants are not issued a definitive result; the values clarification method  
10  
11 allows them to look at a summary of their choices and draw their own conclusion about what  
12  
13 they chose. They may repeat the exercise, selecting other options to compare.  
14  
15  
16  
17  
18  
19 After the interventions were developed in English, the decision aid and values clarification  
20  
21 method were translated into Spanish by certified translators in the University of Utah's Office of  
22  
23 Research Participant Advocacy (as were consent documents and survey measures).  
24  
25

## 26 **Outcomes**

27  
28 All study measures were categorized into three conceptual domains: parental mental and physical  
29  
30 health, decision-making quality, and clinical encounter (e.g., consultation quality) in Table 2.  
31  
32 The primary outcome is distress, measured by the Brief Symptom Inventory Global Severity  
33  
34 Index.<sup>29</sup> The co-secondary outcomes are perinatal grief and decision quality (i.e., adequate  
35  
36 knowledge and concordance between participants' preferences and treatment decision).<sup>30,31</sup>  
37  
38 Additional exploratory outcomes will also be measured. Descriptions of all study measures and  
39  
40 time points for survey data collection are included in Table 2. Parent characteristics will be  
41  
42 examined as potential covariates.  
43  
44  
45

## 46 **Sample Size and Power Calculation**

47  
48 At least 100 families will be randomized 1:1 to the two intervention groups, allowing up to two  
49  
50 parents to participate per fetus/neonate. Our sample size calculations were based on the primary  
51  
52 comparison between DA with and without the VCE. Based on our previous work,<sup>32</sup> we assume  $\geq$   
53  
54  
55  
56  
57  
58  
59  
60

1 80% retention, a 3-month pre-post  $R \geq 0.5$ , an average of  $\geq 1.75$  participating parents per  
2 participating family, an intra-class correlation (ICC) between parents in the same family  $\leq 0.50$ ,  
3 and  $\geq 50$  families randomized to each of the intervention groups (decision aid only and decision  
4 aid with values clarification method). Using these assumptions, the mixed effects model will  
5 provide 80% power with 2-sided  $\alpha=0.05$  to detect a mean difference in the primary outcome,  
6 distress, equal to 0.50 of 1 standard deviation. This represents a medium effect size in Cohen's  
7 terminology.<sup>33</sup> Assuming a pooled SD in the global distress of 0.56 units,<sup>32</sup> the 0.50 SDs  
8 represents a minimum detectable effect of 0.28 units.

### 9 **Data Collection**

10 Potentially eligible parents are identified by the provider. Following provider consultation, a  
11 study team member, trained in interacting with families going through highly emotional medical  
12 events, assesses if this is an appropriate time to approach them about the study. If the parents are  
13 too distressed, they are not approached at the time of the visit but asked if they would be willing  
14 to speak to research staff later. If the parents are deemed approachable by the trained staff, the  
15 study is presented using an informational pamphlet, and the potential participant(s) are  
16 encouraged to follow the link or QR code on the pamphlet if they would like to participate in the  
17 study. The parents who were given the link are recorded in a recruitment tracker. All parents who  
18 follow the link on their own are consented to participate in the study and recorded in REDCap.  
19 This usually happens with parents whose fetuses are prenatally-diagnosed, and they follow the  
20 link from their home electronic devices. If the neonate was postnatally-diagnosed, the parents are  
21 approached in the same manner in the hospital and are given the opportunity to consent and  
22 participate in the study using a tablet in person. Parents who are found to be ineligible or who  
23 decline participation will be recorded along with the reason.

### 1 *Data Abstraction*

2  
3  
4  
5  
6  
7  
8  
9  
10  
11  
12  
13  
14  
15  
16  
17  
18  
19  
20  
21  
22  
23  
24  
25  
26  
27  
28  
29  
30  
31  
32  
33  
34  
35  
36  
37  
38  
39  
40  
41  
42  
43  
44  
45  
46  
47  
48  
49  
50  
51  
52  
53  
54  
55  
56  
57  
58  
59  
60

1 When screening for eligibility, the fetus/neonate diagnosis (verified by a pediatric cardiologist)  
2 and date of diagnosis will be abstracted. Once enrolled in the study, gestational age at birth, the  
3 presence of other syndromes/birth defects, and the dates of surgery (if applicable) will be  
4 abstracted from the medical record and documented. Further surgery dates are recorded by the  
5 research coordinator.

### 7 *Surveys*

8 Participants in the prospective observational control group filled out surveys at three time points:  
9 1) Baseline, 2) Post-Decision, and 3) Three Months Post-Decision (see Table 1 for an overview  
10 of measurements). There are four survey time points for the intervention groups: 1) Baseline, 2)  
11 Post-Viewing of the Decision Aid (or Decision Aid and Values Clarification Method) but prior  
12 to making the decision, 3) Post-Decision, and 4) Three Months Post-Decision. Surveys are  
13 administered via REDCap by sending an email to the participant with a survey link. Participants  
14 may request paper surveys to be mailed to them. If the participant does not access the survey  
15 link, they will be contacted by phone or in person during a routine clinic visit to ask them to fill  
16 out the survey or will be mailed a paper survey.

### 17 *Data Management and Monitoring*

18 Adverse events that occur during data collection will be recorded by the study coordinator, along  
19 with any circumstances that make particular participants unique. In this way, unanticipated data  
20 points during analysis may be explained and accounted for. Additionally, information about  
21 mental health resources are given to participants at the end of each survey, including a 24-hour, 7  
22 days-a-week phone crisis service that is staffed by mental health professionals providing  
23 emotional support, assistance, crisis interventions, and suicide preventions to individuals

1 experiencing emotional distress or psychiatric crisis. The social worker at the children's hospital  
2 also has their contact information listed for participants to be able to reach out.

3  
4 Frequent reports will be run to detect data errors or missing data. Any issues will be addressed  
5 during a weekly meeting between the study coordinator, post-doctoral fellow(s), and the  
6 principal investigator.

### 7 **Data Analysis Plan**

8 After data collection, we will use standardized mean differences to assess balance between  
9 intervention groups in baseline levels of study endpoints and other potential prognostic baseline  
10 indicators, including participants' age, race, and comorbidities. Outcome variables exhibiting  
11 substantial skewness may be transformed to better approximate normality. All participants will  
12 be analyzed in their assigned intervention group according to intention-to-treat, irrespective of  
13 adherence to viewing the decision aid or completing the values clarification method. Although  
14 multiple outcomes will be considered, we have designated a single primary outcome (the BSI  
15 Global Severity Index of global distress, described above) and a single primary comparison time  
16 for this outcome at 3 months.<sup>34</sup> We do not plan formal multiple comparison adjustments for  
17 secondary and exploratory outcomes. Results for secondary and exploratory outcomes will  
18 support or qualify the analyses of the primary outcome, and will be interpreted based on the  
19 overall pattern of results with awareness that some nominally significant relationships may be  
20 false positive findings in the context of multiple analyses. If there is sufficient power to detect  
21 differences, exploratory sub-group analyses may be conducted to detect differences by factors  
22 such as pre versus post-natal diagnoses, CHD diagnosis, provider specialty, and parent dyads.  
23 We also do not plan formal multiple comparison adjustment for the randomized comparison

1 between intervention groups (Decision Aid Only v. Decision Aid with Values Clarification  
2 Method) and the non-randomized comparison (Decision Aid v. Control), as these comparisons  
3 address distinct hypotheses and are thus appropriate for evaluation on a comparison wise basis.<sup>35</sup>

#### 4 **Determining Intervention Effects on Study Endpoints**

5 *Randomized Comparisons Between Intervention Groups (Decision Aid Only V. Decision Aid*  
6 *with Values Clarification Method)*. The primary outcome, distress, measured at post-decision  
7 aid, post-decision, and 3-month will be compared between groups by applying restricted  
8 maximum likelihood estimation to a linear mixed effects model<sup>36</sup> with fixed provider effects and  
9 random family effects to account for clustering of outcomes due to these factors and an  
10 unstructured residual covariance model to account for serial correlation across the three  
11 longitudinal assessments. Inclusion of fixed effects for provider is appropriate since families are  
12 randomized to the two intervention groups for each provider, and may improve statistical power  
13 by controlling for provider variation. The model will also include fixed effects for randomized  
14 assignment as well as the baseline distress.<sup>34</sup> Additional pre-specified covariate adjustment is not  
15 planned, as we are not aware of further baseline factors that are likely to have a strong  
16 association with the 3-month distress once the baseline distress is accounted for.<sup>35</sup> However,  
17 should a prognostic baseline factor exhibit imbalance between the randomized groups, a post-hoc  
18 sensitivity analysis will be performed with covariate adjustment for that factor to assess the  
19 robustness of the results to the imbalance. The 3-month comparison will represent the primary  
20 contrast for assessing the effect of the decision support intervention. It is possible that the full  
21 mixed effects model will fail to converge due to the inclusion of separate random effects for  
22 provider and family as well as an unstructured covariate matrix for repeated assessments in the  
23 same patient. In the event the full model fails to converge, we will repeat analyses after dropping



1 the provider random effect. If this also fails to provide convergence, the unstructured covariance  
2 model for serial correlation will be simplified.

3  
4  
5  
6  
7  
8  
9  
10 Similar mixed effects analyses will be used for numeric secondary and exploratory outcome  
11 variables, including the perinatal grief (secondary outcome) and most of the exploratory  
12 outcomes. For binary outcomes, including the decision quality secondary outcome, we will apply  
13 generalized estimating equations (GEE) for log-binomial regression (if convergence is achieved)  
14 or modified Poisson regression<sup>37</sup> (if not) to compare the proportions of participants with the  
15 outcome between the intervention groups. The post-decision comparison will be the main  
16 comparison for evaluating the effects of the interventions on secondary and exploratory  
17 outcomes hypothesized to respond quickly to the decision aid (e.g. parent-provider  
18 communication, self-efficacy) while the 3-month comparison will represent the main treatment  
19 contrast for outcomes hypothesized to respond over a longer time (e.g., grief, decision regret).

20  
21  
22  
23  
24  
25  
26  
27  
28  
29  
30  
31  
32  
33  
34  
35 *Non-Randomized Comparisons of Decision Aid Only v. Control Group.* The primary outcome,  
36 distress, will be compared between the groups receiving the decision aid and the control group  
37 using an extension of the linear mixed effects model described above. The model will again  
38 include fixed effects for provider and random effects for family and an unstructured covariance  
39 matrix to account serial correlation, but will be expanded to include all three treatment groups  
40 and will include not only the baseline distress measure but also timing of diagnosis, race, and  
41 literacy level as covariates to reduce bias in these non-randomized comparisons. The comparison  
42 of Decision Aid without Values Clarification Method vs. Control will represent the primary  
43 treatment comparison to evaluate the effect of the decision aid. The comparison of Decision Aid  
44  
45  
46  
47  
48  
49  
50  
51  
52  
53  
54  
55  
56  
57  
58  
59  
60

1 with Values Clarification Method) vs. Control will provide a secondary assessment of the  
2 combined effect of decision support and values clarification method together. Similar extensions  
3 using linear mixed models for numeric outcomes and GEE for binary or categorical outcomes  
4 will be applied for additional non-randomized comparisons between the decision support and  
5 control groups.

6  
7 *Missing Data.* The proposed analyses of the primary and numeric secondary and exploratory  
8 outcomes apply likelihood-based inference and will thus remain approximately unbiased in the  
9 presence of missing data so long as the pattern of missingness follows a missing at random  
10 (MAR) mechanism.<sup>38</sup> To evaluate risk of bias from missing data patterns which depend on  
11 measured factors not included in the analytic models, participant characteristics will be  
12 compared between participants with complete data for the primary and main secondary outcomes  
13 and those participants with incomplete data. If substantial imbalances are detected, or if > 10%  
14 of participants have missing data for a primary or secondary outcome, multiple imputation will  
15 be used to impute missing outcome measurements. The multiple imputation will be performed  
16 with a Markov Chain Monte Carlo (MCMC) algorithm using an imputation model incorporating  
17 each analysis variable as well as auxiliary variables that are related to the probability of  
18 missingness.<sup>39</sup> Rubin's formulae will be used to account for the uncertainty introduced by the  
19 missing data. When data are missing for items within scales, we will use recommended  
20 imputation procedures rather than deleting participants listwise from the analysis.<sup>38</sup>

## 21 22 **Ethics and Dissemination**

1 This study was approved by the Institutional Review Board (IRB), and continues to be re-  
2 approved yearly according to the IRB's standards. Important modifications made to the data  
3 collection routine section of the IRB application will be reported in the findings if those changes  
4 are found to have impacted the data.

5  
6 Consent to participate in the study is obtained from participants when they fill out the baseline  
7 survey. As this is a low-risk study, no signature is required. All survey data will be de-identified  
8 before sharing the results, posing no risk to participant confidentiality. Access to the data may be  
9 granted to outside parties on a case-by-case basis by the discretion of the PI. The study is  
10 registered on ClinicalTrials.gov (NCT04437069) where the public can access the full protocol.  
11 Study modifications and results will also be reported on ClinicalTrials.gov. In addition, findings  
12 will be disseminated through presentations at scientific meetings and publications in peer-  
13 reviewed journals.

## 14 15 **Discussion**

16 Parents of a fetus or neonate diagnosed with a life-threatening congenital heart defect are  
17 confronted with a significant and challenging decision between termination (when diagnosed  
18 prenatally), palliative care, or surgery.<sup>5-8</sup> This preference-sensitive decision should be supported  
19 through shared decision making whereby the family and providers can mutually engage in  
20 treatment decision making which is driven by what matters most to families and understanding  
21 of the diagnosis and treatment options.<sup>20,21</sup> Decision aids are one approach to facilitate shared  
22 decision making.<sup>40</sup> The present study aims to evaluate the effect of a novel, family-centered  
23 decision aid on parent mental and physical health, decision-making, and clinical encounter

1 outcomes. Few studies have examined how effective values clarification methods, which the  
2 International Patient Decision Aids Standards collaborative added as criteria for decision aids,  
3 are when combined with a decision aid in clinical contexts.<sup>26</sup> Therefore, this study also aims to  
4 contribute to the literature by examining the effect of the decision aid with and without a values  
5 clarification method.

6  
7 There are some potential study limitations to note that are common when studying pediatric  
8 conditions. There may be issues with meeting sample size requirements for sufficient statistical  
9 power. This issue could arise due to the rarity of severe CHD diagnoses and the potential for  
10 high attrition as parents are under high emotional burdens and distress surrounding the diagnosis,  
11 decision, and coping or managing the treatment they choose. Our study design attempts to  
12 proactively address these issues. For instance, we will use extensive follow-up procedures via  
13 telephone or in person to minimize attrition. If questionnaire burden results in higher than  
14 expected attrition, we will limit questions to the primary and secondary outcomes.

15  
16 Our study will significantly contribute to advancing decision support and counseling for parents  
17 making life-altering decisions for their fetus or neonate with a life-threatening heart defect. This  
18 important and innovative decision aid and values clarification method will also build on the  
19 dearth of decision aids in pediatric, surrogate decision-making contexts.

1  
2  
3 **1 Acknowledgments**  
4

5  
6 2 We are very grateful to our parent collaborators who provided feedback on the decision and  
7  
8 3 development of the decision aid, outcome measures, and study recruitment methods. We thank  
9  
10 4 members of the Genetic Science Learning Center at the University of Utah – Harmony Starr,  
11  
12 5 Kevin Pompei, and Jason Harris who developed the app for the decision aid.  
13  
14  
15 6

16  
17  
18  
19  
20  
21  
22  
23  
24  
25  
26  
27  
28  
29  
30  
31  
32  
33  
34  
35  
36  
37  
38  
39  
40  
41  
42  
43  
44  
45  
46  
47  
48  
49  
50  
51  
52  
53  
54  
55  
56  
57  
58  
59  
60

For peer review only

1 **Table 1.** Decision Aid Content

|                                                      |                                                                                                                                                                                                                                                                                                                                                                                                                                                                                                                                                                                                                                                                       |
|------------------------------------------------------|-----------------------------------------------------------------------------------------------------------------------------------------------------------------------------------------------------------------------------------------------------------------------------------------------------------------------------------------------------------------------------------------------------------------------------------------------------------------------------------------------------------------------------------------------------------------------------------------------------------------------------------------------------------------------|
| 1. <i>You Are Not Alone</i>                          | This introductory video (07:53 min), is intended to normalize the experience and set the stage before some of the more technical information in the tool. Key messages are: this is a difficult time for you, it's OK to cry, you didn't cause this, and you are the most qualified to make this decision. The video also describes the goals of the tool.                                                                                                                                                                                                                                                                                                            |
| 2. <i>How the Heart Works</i>                        | This section includes animations and information on the cardiovascular system, normal fetal and post-fetal heart circulation, defects that can take place during heart development that lead to abnormal heart function, and a glossary of medical terms.                                                                                                                                                                                                                                                                                                                                                                                                             |
| 3. <i>What is a Congenital Heart Defect?</i>         | This section defines congenital heart defects and how they are caused and diagnosed.                                                                                                                                                                                                                                                                                                                                                                                                                                                                                                                                                                                  |
| 4. <i>How We Talk About Congenital Heart Defects</i> | This section introduces parents to topics and terms that are often used when discussing congenital heart defects, including statistics, diagnosis variability, survival and quality of life (e.g., developmental delay in cognitive abilities)                                                                                                                                                                                                                                                                                                                                                                                                                        |
| 5. <i>Learn More About Your Baby's Diagnosis</i>     | This section shows parents individualized information specific to their fetus/neonate's diagnosis. Diagnoses available in this section include Hypoplastic Left Heart Syndrome (HLHS), Complex Single Ventricle (CSV), Complex Single Ventricle with Heterotaxy (Isomerism), Pulmonary Atresia with Intact Ventricular Septum (PA/IVS), Ebstein's Anomaly of the Tricuspid Valve (With Severe Leak) and Truncus Arteriosus. Each diagnosis profile includes animated videos depicting the defect, statistics related to how common the defect is, other associated conditions, risks of having another child with the defect and expected outcomes without treatment. |
| 6. <i>Learn More About Your Choices</i>              | This is divided into three sections: Surgery, Comfort Care, and Ending the Pregnancy. Each section begins with a "What to Expect" overview and includes a description of the medical team members who may be involved, financial implications, living with this decision, and links to other websites and                                                                                                                                                                                                                                                                                                                                                             |

|                                             |                                                                                                                                                                                                                                                                                                                                                                                                                                                                            |
|---------------------------------------------|----------------------------------------------------------------------------------------------------------------------------------------------------------------------------------------------------------------------------------------------------------------------------------------------------------------------------------------------------------------------------------------------------------------------------------------------------------------------------|
|                                             | support groups. Additional information is tailored to each choice.                                                                                                                                                                                                                                                                                                                                                                                                         |
| 7. <i>Firsthand Experiences</i>             | This section contains stories from parents who chose Comfort Care, Surgery or Ending the Pregnancy, in which they describe their personal experiences. Five stories are provided for each of the three choices, reflecting a variety of different outcomes. Surgery stories include examples where the child had no serious medical complications growing up, examples where the child does have complications, and examples where the child did not survive post-surgery. |
| 8. <i>Questions You Can Ask Your Doctor</i> | This is a list of possible questions parents may wish to ask care providers. Parents can checkmark the questions they wish to take with them to their doctor, and the tool will email them just these questions. They can then either print or access their questions digitally while in their appointment.                                                                                                                                                                |

1  
2  
3  
4  
5  
6  
7  
8  
9  
10  
11  
12  
13  
14  
15  
16  
17  
18  
19  
20  
21  
22  
23  
24  
25  
26  
27  
28  
29  
30  
31  
32  
33  
34  
35  
36  
37  
38  
39  
40  
41  
42  
43  
44  
45  
46  
47  
48  
49  
50  
51  
52  
53  
54  
55  
56  
57  
58  
59  
60

**Table 2.** Study Outcomes, Descriptions, and Survey Measure Time Points

| Measure                                    | Description                                                                                                                                                                                                                                                                                                                                                                                                                                                                                          | Measure Timepoints |        |        |        |
|--------------------------------------------|------------------------------------------------------------------------------------------------------------------------------------------------------------------------------------------------------------------------------------------------------------------------------------------------------------------------------------------------------------------------------------------------------------------------------------------------------------------------------------------------------|--------------------|--------|--------|--------|
|                                            |                                                                                                                                                                                                                                                                                                                                                                                                                                                                                                      | Time 1             | Time 2 | Time 3 | Time 4 |
| <b>Primary Outcome</b>                     |                                                                                                                                                                                                                                                                                                                                                                                                                                                                                                      |                    |        |        |        |
| <b>Mental and Physical Health Outcomes</b> |                                                                                                                                                                                                                                                                                                                                                                                                                                                                                                      |                    |        |        |        |
| Distress <sup>29</sup>                     | Basic Symptom Inventory (BSI) Global Severity Index of Global Distress: a validated scale of 53 questions that indicate the degree of stress the participant has experienced within the previous seven days. Answers range on a 5-point Likert scale from 0=not at all to 4=extremely.                                                                                                                                                                                                               | X                  | X      | X      | X      |
| <b>Secondary Outcomes</b>                  |                                                                                                                                                                                                                                                                                                                                                                                                                                                                                                      |                    |        |        |        |
| <b>Decision Making Outcomes</b>            |                                                                                                                                                                                                                                                                                                                                                                                                                                                                                                      |                    |        |        |        |
| Perinatal Grief <sup>30</sup>              | Twenty-seven questions measuring grief, coping, and despair following the death of a child. Rated on a 5-point Likert scale that ranges from 1=strongly disagree to 5=strongly agree.                                                                                                                                                                                                                                                                                                                |                    |        |        | X      |
| Decision Quality (Values) <sup>31</sup>    | Six questions on parent’ decisional values (e.g., “How important it is to you that your child have as little pain and discomfort from treatment as possible?”) rated on a 6-point Likert scale from 1=most important to 6=not as important.                                                                                                                                                                                                                                                          |                    | X      | X      | X      |
| Decision Quality (Knowledge) <sup>31</sup> | Twenty-six questions assessing the participants’ knowledge of treatment options for CHD in two domains. The first domain regards understanding about CHD diagnosis and what the heart does, the available options, and the outcomes of comfort care. The second domain regards understanding about the outcomes of surgery/intervention and the impact of CHD on family. 21 of the questions use a dichotomous response format (either "true / false" or "yes/no"); 5 questions are multiple choice. |                    | X      | X      | X      |



| Exploratory Outcomes                                |                                                                                                                                                                                                                                                                                                                                                                                                                                                                                                                            |   |   |   |   |
|-----------------------------------------------------|----------------------------------------------------------------------------------------------------------------------------------------------------------------------------------------------------------------------------------------------------------------------------------------------------------------------------------------------------------------------------------------------------------------------------------------------------------------------------------------------------------------------------|---|---|---|---|
| Mental and Physical Health Outcomes                 |                                                                                                                                                                                                                                                                                                                                                                                                                                                                                                                            |   |   |   |   |
| Mental and Physical Functional Health <sup>41</sup> | SF-12: Twelve items measuring the respondents' health across multiple dimensions. Answers rated on a 5-point Likert scale ranging from 1=excellent to 5=poor for three questions; answers are given in a dichotomous (yes/no) format for four questions; answers are given on a 6-point Likert scale ranging from 1=all of the time to 6=none of the time for three questions; answers are given in a trichotomous format (yes, limited a little; yes, limited a lot; no, not limited at all) for the final two questions. | X |   |   | X |
| Parental Quality of Life <sup>42</sup>              | ICCAP: Thirty-two questions to assess the impact on parental quality of life. Four questions ask about contact with caregivers, six ask about support from social networks, five ask about partner relationships, four ask about the participant's state of mind, and the remaining thirteen ask about fear and anxiety. Answers range on a 4-point Likert scale that ranges from 1=strongly disagree to 4=strongly agree, with a "not applicable" option.                                                                 |   |   | X | X |
| Decision Making Outcomes                            |                                                                                                                                                                                                                                                                                                                                                                                                                                                                                                                            |   |   |   |   |
| Preference for SDM <sup>43</sup>                    | Adaption of Degner & Sloan's Control Preference Scale - A single question on how participants plan to make the decision. Responses include 1=My doctor(s) will make the decision with little input from me, 2=My doctor(s) will make the decision but will seriously consider my opinion, 3=My doctor(s) and I will make the decision together, 4=I will make the decision after seriously considering my doctor(s) opinion, 5=I will make the decision with little input from my doctor(s).                               | X | X | X |   |

|                                               |                                                                                                                                                                                                                                                                                                                                                                                                                                                                                                                                          |   |   |   |   |
|-----------------------------------------------|------------------------------------------------------------------------------------------------------------------------------------------------------------------------------------------------------------------------------------------------------------------------------------------------------------------------------------------------------------------------------------------------------------------------------------------------------------------------------------------------------------------------------------------|---|---|---|---|
| Preparation for Decision Making <sup>44</sup> | A validated scale which will assess participants' perspectives of the decision aid's usefulness in preparing them to communicate with their clinicians and for Shared Decision Making. These questions are answered on a Likert scale ranging from 1=not at all to 5=a great deal.                                                                                                                                                                                                                                                       |   | X |   |   |
| Decision Self-Efficacy <sup>45</sup>          | Eleven questions to assess self-efficacy for making an informed choice (e.g., getting needed information, asking questions, expressing opinions) using a 5-point Likert scale ranging from 0=not at all confident to 4=extremely confident.                                                                                                                                                                                                                                                                                              | X | X | X |   |
| Decision Conflict <sup>46</sup>               | Sixteen questions measuring: 1) perceptions of uncertainty in choosing options, 2) feelings of having adequate knowledge and clear values, and 3) effective decision making. All items use a 5-point Likert scale ranging from 0=strongly disagree to 4=strongly agree.                                                                                                                                                                                                                                                                  |   | X | X | X |
| Decision Regret <sup>47</sup>                 | Five questions asking participants to reflect on the decision they made about which treatment option they chose for their child. All questions assessed on a 5-point Likert scale from 1=strongly disagree to 5=strongly agree.                                                                                                                                                                                                                                                                                                          |   |   |   | X |
| Use of Information Sources                    | Extent that participants consulted any of 10 sources of health information. 2 sources are about personal relationships (i.e., relatives and friends), 3 are about mass media (i.e., exposure to television/movies, magazines, and books about CHD), 2 are educational/research sources (e.g., scientific journals) and the remaining 4 are about providers, support groups, other parents who have a child with CHD, and spiritual or religious advisor. Answers rated on a 5-point Likert scale ranging from 1=never to 5=a great deal. |   | X |   |   |

|                                                     |                                                                                                                                                                                                                                                                                                                                                     |   |   |   |   |
|-----------------------------------------------------|-----------------------------------------------------------------------------------------------------------------------------------------------------------------------------------------------------------------------------------------------------------------------------------------------------------------------------------------------------|---|---|---|---|
| Treatment Choice                                    | Treatment Choice will be assessed by asking participants to identify which treatment they chose. Using electronic health records, we will record the child's actual treatment in case of parental change of mind or misreport.                                                                                                                      |   | X | X | X |
| Acceptability of Decision Aid                       | Participants answered five questions about if they used the decision aid (DA) before their appointment or during their appointment, their likelihood to recommend the DA, the amount of information presented, and if the DA seemed biased.                                                                                                         |   | X |   |   |
| <b>Clinical Encounter Outcomes</b>                  |                                                                                                                                                                                                                                                                                                                                                     |   |   |   |   |
| COMRADE <sup>48</sup>                               | Ten questions on 5-point scale (1=strongly disagree, 5=strongly agree) to evaluate the participant's perspective of the effectiveness of risk communication and treatment decision making in clinician consultations.                                                                                                                               |   |   | X |   |
| Consultation Quality <sup>49</sup>                  | Participants complete 2 questions that measure the quality of consultation. One measures the perceived usefulness of consultation on a 7 point Likert scale that ranges from 0=not at all useful to 6=very useful. The second question measures participants' perspective regarding whether the clinician was biased towards any certain treatment. | X |   | X |   |
| <b>Parents' Characteristics and Survey Feedback</b> |                                                                                                                                                                                                                                                                                                                                                     |   |   |   |   |
| Demographics                                        | Participants indicate their gender, education, race, ethnicity, number of children, religion, marital status, and whether or not they have health insurance.                                                                                                                                                                                        | X |   |   |   |
| Literacy <sup>50</sup>                              | Three validated, brief questions identifying participants with inadequate health literacy.                                                                                                                                                                                                                                                          | X |   |   |   |

1  
2  
3  
4  
5  
6  
7  
8  
9  
10  
11  
12  
13  
14  
15  
16  
17  
18  
19  
20  
21  
22  
23  
24  
25  
26  
27  
28  
29  
30  
31  
32  
33  
34  
35  
36  
37  
38  
39  
40  
41  
42  
43  
44  
45  
46  
47

|                           |                                                                                                                                                                                                                                                                                                                                                                                                                         |   |   |   |   |
|---------------------------|-------------------------------------------------------------------------------------------------------------------------------------------------------------------------------------------------------------------------------------------------------------------------------------------------------------------------------------------------------------------------------------------------------------------------|---|---|---|---|
| Numeracy <sup>51</sup>    | A validated scale of 8 questions that distinguish an individual's quantitative ability without asking overly-invasive questions. Answers are rated on a 6-point Likert scale ranging from 1=not at all good/never to 6=extremely good/very often for six questions, 1=always prefer percentages to 6=always prefer numbers for one question, and 1=always prefer percentages to 6=always prefer words for one question. | X |   |   |   |
| Religiosity <sup>52</sup> | Two items asking “How often do you attend church or other religious meetings” (1=Never to 6=More than once/week) and “How often do you spend time in private religious activities, such as prayer, meditation or Bible study” (1=Rarely or never to 6=More than once a day)                                                                                                                                             | X |   |   |   |
| Assessing Survey Burden   | Six yes/no questions asked if the survey had burdensome questions, one 5-point Likert scale question asked about how useful the participant perceived the survey would be (1=not at all useful and 5=very useful), two 5-point Likert scale questions asked participants to rate how burdensome/time consuming the survey was from 1=time consuming/burdensome to 5=quick/easy.                                         | X | X | X | X |

Note: Time 1= at diagnosis, Time 2= post-receipt of decision aid, Time 3= post-decision, Time 4= 3 months post- decision

## Figure 1: Study Flow

### References

1. Oster ME, Lee KA, Honein MA, Riehle-Colarusso T, Shin M, Correa A. Temporal trends in survival among infants with critical congenital heart defects. *Pediatrics*. May 2013;131(5):e1502-8. doi:10.1542/peds.2012-3435
2. Hoffman JI, Kaplan S. The incidence of congenital heart disease. *J Am Coll Cardiol*. Jun 19 2002;39(12):1890-900. doi:10.1016/s0735-1097(02)01886-7
3. Reller MD, Strickland MJ, Riehle-Colarusso T, Mahle WT, Correa A. Prevalence of congenital heart defects in metropolitan Atlanta, 1998-2005. *J Pediatr*. Dec 2008;153(6):807-13. doi:10.1016/j.jpeds.2008.05.059
4. Peterson C, Dawson A, Grosse SD, et al. Hospitalizations, costs, and mortality among infants with critical congenital heart disease: how important is timely detection? *Birth Defects Res A Clin Mol Teratol*. Oct 2013;97(10):664-72. doi:10.1002/bdra.23165
5. Barron DJ, Kilby MD, Davies B, Wright JG, Jones TJ, Brawn WJ. Hypoplastic left heart syndrome. *Lancet*. Aug 15 2009;374(9689):551-64. doi:10.1016/s0140-6736(09)60563-8
6. Bertaud S, Lloyd DF, Laddie J, Razavi R. The importance of early involvement of paediatric palliative care for patients with severe congenital heart disease. *Arch Dis Child*. Oct 2016;101(10):984-7. doi:10.1136/archdischild-2015-309789
7. Chenni N, Lacroze V, Pouet C, et al. Fetal heart disease and interruption of pregnancy: factors influencing the parental decision-making process. *Prenatal Diagnosis*. 2012;32(2):168-172. doi:10.1002/pd.2923
8. Zeigler VL. Ethical principles and parental choice: treatment options for neonates with hypoplastic left heart syndrome. *Pediatr Nurs*. Jan-Feb 2003;29(1):65-9.
9. Davies V, Gledhill J, McFadyen A, Whitlow B, Economides D. Psychological outcome in women undergoing termination of pregnancy for ultrasound-detected fetal anomaly in the first and second trimesters: a pilot study. *Ultrasound Obstet Gynecol*. Apr 2005;25(4):389-92. doi:10.1002/uog.1854
10. Korenromp MJ, Christiaens GC, van den Bout J, et al. Long-term psychological consequences of pregnancy termination for fetal abnormality: a cross-sectional study. *Prenat Diagn*. Mar 2005;25(3):253-60. doi:10.1002/pd.1127
11. López R, Frangini P, Ramírez M, et al. Well-Being and Agency in Parents of Children With Congenital Heart Disease: A Survey in Chile. *World J Pediatr Congenit Heart Surg*. Mar 2016;7(2):139-45. doi:10.1177/2150135115623284
12. Lawoko S, Soares JJ. Distress and hopelessness among parents of children with congenital heart disease, parents of children with other diseases, and parents of healthy children. *J Psychosom Res*. Apr 2002;52(4):193-208. doi:10.1016/s0022-3999(02)00301-x
13. Uzark K, Jones K. Parenting stress and children with heart disease. *J Pediatr Health Care*. Jul-Aug 2003;17(4):163-8. doi:10.1067/mp.2003.22
14. Bevilacqua F, Palatta S, Mirante N, et al. Birth of a child with congenital heart disease: emotional reactions of mothers and fathers according to time of diagnosis. *J Matern Fetal Neonatal Med*. Aug 2013;26(12):1249-53. doi:10.3109/14767058.2013.776536
15. Kaasen A, Helbig A, Malt U, Naes T, Skari H, Haugen G. Acute maternal social dysfunction, health perception and psychological distress after ultrasonographic detection of a fetal structural anomaly. *BJOG: An International Journal of Obstetrics & Gynaecology*. 2010-08-01 2010;117(9):1127-1138. doi:10.1111/j.1471-0528.2010.02622.x

16. Vrijmoet-Wiersma CM, Ottenkamp J, van Roozendaal M, Grootenhuis MA, Koopman HM. A multicentric study of disease-related stress, and perceived vulnerability, in parents of children with congenital cardiac disease. *Cardiol Young*. Dec 2009;19(6):608-14. doi:10.1017/s1047951109991831
17. Kon AA. Healthcare providers must offer palliative treatment to parents of neonates with hypoplastic left heart syndrome. *Arch Pediatr Adolesc Med*. Sep 2008;162(9):844-8. doi:10.1001/archpediatrics.2008.3
18. Muenke M, Kruszka P, Sable C, Belmont J. *Congenital Heart Disease: Molecular Genetics, Principles of Diagnosis and Treatment*. Karger Medical and Scientific Publishers; 2015.
19. Boss R, Shapiro M. *Congenital Heart Disease*. Karger Publishers; 2015:298-305:chap Ethical considerations in congenital heart disease.
20. Kon AA, Ackerson L, Lo B. How pediatricians counsel parents when no "best-choice" management exists: lessons to be learned from hypoplastic left heart syndrome. *Archives of pediatrics & adolescent medicine*. 2004;158(5):436-41. doi:10.1001/archpedi.158.5.436
21. Byrne PJ, Murphy A. Informed consent and hypoplastic left heart syndrome. *Acta Paediatr*. Sep 2005;94(9):1171-5. doi:10.1111/j.1651-2227.2005.tb02069.x
22. Rocque R, Chipenda Dansokho S, Grad R, Witteman HO. What Matters to Patients and Families: A Content and Process Framework for Clarifying Preferences, Concerns, and Values. *Medical Decision Making*. 2020-08-01 2020;40(6):722-734. doi:10.1177/0272989x20940660
23. Stacey D, Légaré F, Lewis K, et al. Decision aids for people facing health treatment or screening decisions. *Cochrane Database of Systematic Reviews*. 2017;(4)doi:10.1002/14651858.CD001431.pub5
24. Fagerlin A, Pignone M, Abhyankar P, et al. Clarifying values: An updated review. *BMC Med Inform Decis Mak*. 2013;13(Suppl 2):S8-S8. doi:10.1186/1472-6947-13-s2-s8
25. Witteman HO, Scherer LD, Gavaruzzi T, et al. Design Features of Explicit Values Clarification Methods: A Systematic Review. *Med Decis Making*. May 2016;36(4):453-71. doi:10.1177/0272989x15626397
26. Witteman HO, Ndjaboue R, Vaisson G, et al. *Clarifying Values: An Updated and Expanded Systematic Review and Meta-Analysis*. Cold Spring Harbor Laboratory; 2021.
27. Pinto NM, Patel, A., Delaney, R. K., Donofrio, M. T., Marino, B. S., Miller, S., Ozanne, E. M., Karasawa, M. H., Pershing, M. L., Zickmund, S. L., & Fagerlin, A. . Provider insights on shared decision making with families affected by congenital heart disease. 2021
28. Delaney RK, Pinto, N., Patel, A., Ozanne, E., Marino, B. S., Donofrio, M. T., Miller, S. G., Andes, R., Young, J., & Fagerlin, A. Providers perceptions on counseling families with a neonate or fetus with severe congenital heart disease: A qualitative study. presented at: 42nd annual meeting and scientific sessions of the Society of Behavioral Medicine 2021;
29. Derogatis L. *Brief Symptom Inventory*. Clinical Psychometric Research 1975.
30. Toedter LJ, Lasker JN, Alhadeff JM. The Perinatal Grief Scale: development and initial validation. *Am J Orthopsychiatry*. Jul 1988;58(3):435-49. doi:10.1111/j.1939-0025.1988.tb01604.x
31. Sepucha K, Ozanne E, Silvia K, Partridge A, Mulley AG, Jr. An approach to measuring the quality of breast cancer decisions. *Patient Educ Couns*. Feb 2007;65(2):261-9. doi:10.1016/j.pec.2006.08.007

- 1  
2  
3 32. Pinto NM, Weng C, Sheng X, et al. Modifiers of stress related to timing of diagnosis in  
4 parents of children with complex congenital heart disease. *The Journal of Maternal-Fetal &*  
5 *Neonatal Medicine*. 2016;29(20):3340-3346. doi:10.3109/14767058.2015.1125465  
6  
7 33. Cohen J. A power primer. *Psychol Bull*. Jul 1992;112(1):155-9. doi:10.1037//0033-  
8 2909.112.1.155  
9  
10 34. Zhang J, Quan H, Ng J, Stepanavage ME. Some statistical methods for multiple  
11 endpoints in clinical trials. *Control Clin Trials*. Jun 1997;18(3):204-21. doi:10.1016/s0197-  
12 2456(96)00129-8  
13  
14 35. Bender R, Lange S. Adjusting for multiple testing--when and how? *J Clin Epidemiol*. Apr  
15 2001;54(4):343-9. doi:10.1016/s0895-4356(00)00314-0  
16  
17 36. Verbeke G, Molenberghs G. *Linear mixed models for longitudinal data*. Springer Science  
18 & Business Media; 2009.  
19  
20 37. Zou G. A modified poisson regression approach to prospective studies with binary data.  
21 *Am J Epidemiol*. Apr 1 2004;159(7):702-6. doi:10.1093/aje/kwh090  
22  
23 38. Little RJA, Rubin DB. *The Analysis of Social Science Data with Missing Values*.  
24 *Sociological Methods & Research*. 1989/11/01 1989;18(2-3):292-326.  
25 doi:10.1177/0049124189018002004  
26  
27 39. Schafer JL. Multiple imputation: a primer. *Statistical Methods in Medical Research*.  
28 1999/02/01 1999;8(1):3-15. doi:10.1177/096228029900800102  
29  
30 40. Charles C, Gafni A, Whelan T. Shared decision-making in the medical encounter: What  
31 does it mean? (or it takes at least two to tango). *Social Science & Medicine*. 1997/03/01/  
32 1997;44(5):681-692. doi:[https://doi.org/10.1016/S0277-9536\(96\)00221-3](https://doi.org/10.1016/S0277-9536(96)00221-3)  
33  
34 41. Ware J, Jr., Kosinski M, Keller SD. A 12-Item Short-Form Health Survey: construction  
35 of scales and preliminary tests of reliability and validity. *Med Care*. Mar 1996;34(3):220-33.  
36 doi:10.1097/00005650-199603000-00003  
37  
38 42. Mazer P, Gischler SJ, Koot HM, Tibboel D, van Dijk M, Duivenvoorden HJ. Impact of a  
39 child with congenital anomalies on parents (ICCAP) questionnaire; a psychometric analysis.  
40 *Health and quality of life outcomes*. 2008;6:102-102. doi:10.1186/1477-7525-6-102  
41  
42 43. Degner LF, Sloan JA. Decision making during serious illness: What role do patients  
43 really want to play? *Journal of Clinical Epidemiology*. 1992;45(9):941-950.  
44  
45 44. Bennett C, Graham ID, Kristjansson E, Kearing SA, Clay KF, O'Connor AM. Validation  
46 of a Preparation for Decision Making scale. *Patient Educ Couns*. 2010;78(1):130-133.  
47 doi:10.1016/j.pec.2009.05.012  
48  
49 45. O'Connor A. *Decision self-efficacy scale*. 1995.  
50  
51 46. O'Connor A. Validation of a decisional conflict scale. *Medical decision making*.  
52 1995;15(1):25-30. doi:10.1177/0272989X9501500105  
53  
54 47. Brehaut JC, O'Connor AM, Wood TJ, et al. Validation of a decision regret scale. *Medical*  
55 *Decision Making*. 2003;23(4):281-292. doi:10.1177/0272989X03256005  
56  
57 48. Edwards A, Elwyn G, Hood K, et al. The development of COMRADE--a patient-based  
58 outcome measure to evaluate the effectiveness of risk communication and treatment decision  
59 making in consultations. *Patient Educ Couns*. Jul 2003;50(3):311-22. doi:10.1016/s0738-  
60 3991(03)00055-7  
61  
62 49. Bekker HL, Hewison J, Thornton JG. Applying decision analysis to facilitate informed  
63 decision making about prenatal diagnosis for Down syndrome: A randomised controlled trial.  
64 *Prenatal Diagnosis*. 2004;24(4):265-275. doi:10.1002/pd.851  
65  
66  
67  
68  
69  
70

- 1  
2  
3 50. Chew LD, Bradley KA, Boyko EJ. Brief questions to identify patients with inadequate  
4 health literacy. *Family Medicine*. 2004;36(8):588-594.  
5  
6 51. Fagerlin A, Zikmund-Fisher BJ, Ubel PA, Jankovic A, Derry HA, Smith DM. Measuring  
7 numeracy without a math test: development of the subjective numeracy scale. *Medical Decision*  
8 *Making*. 2007;27(5):672-680. doi:10.1177/0272989X07304449  
9  
10 52. Koenig HG, Büsing A. The Duke University Religion Index (DUREL): A Five-Item  
11 Measure for Use in Epidemiological Studies. *Religions*. 2010;1(1):78-85. doi:10.3390/rel1010078  
12  
13  
14  
15  
16  
17  
18  
19  
20  
21  
22  
23  
24  
25  
26  
27  
28  
29  
30  
31  
32  
33  
34  
35  
36  
37  
38  
39  
40  
41  
42  
43  
44  
45  
46  
47  
48  
49  
50  
51  
52  
53  
54  
55  
56  
57  
58  
59  
60

For peer review only



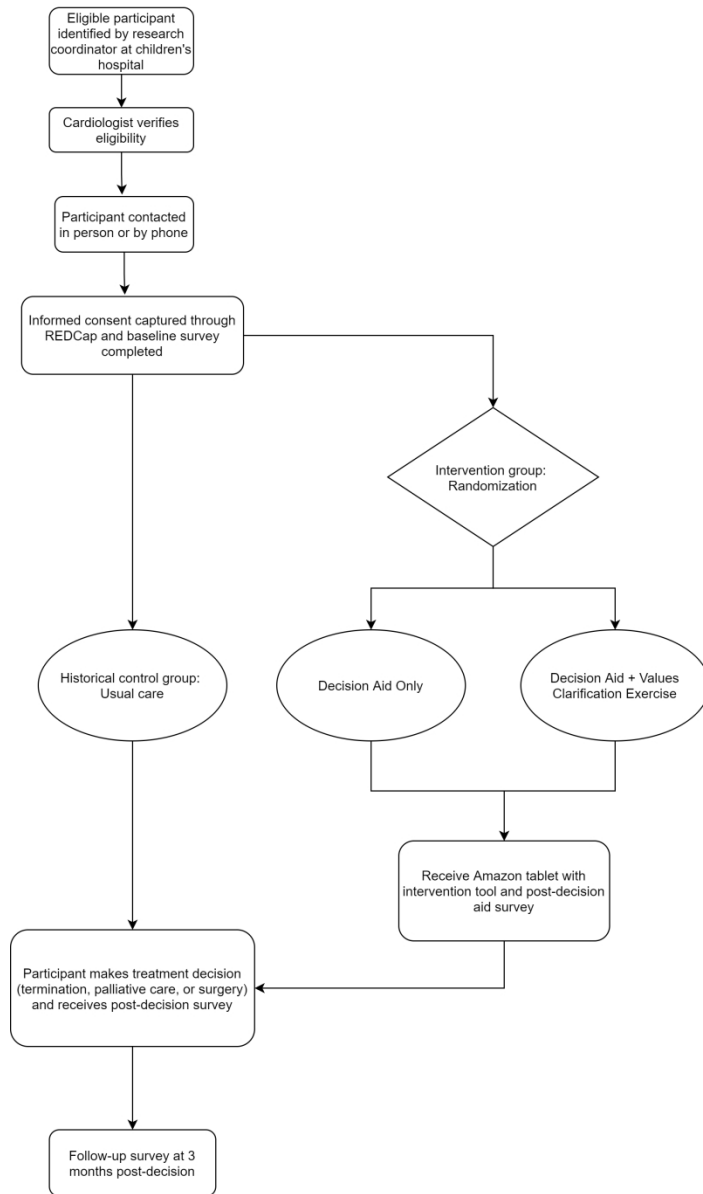

Figure 1: Study Flow

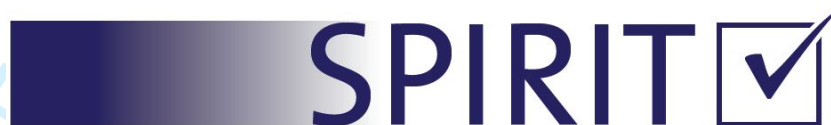

STANDARD PROTOCOL ITEMS: RECOMMENDATIONS FOR INTERVENTIONAL TRIALS

SPIRIT 2013 Checklist: Recommended items to address in a clinical trial protocol and related documents\*

| Section/item                      | ItemNo | Description                                                                                                  | Page in manuscript |
|-----------------------------------|--------|--------------------------------------------------------------------------------------------------------------|--------------------|
| <b>Administrative information</b> |        |                                                                                                              |                    |
| Title                             | 1      | Descriptive title identifying the study design, population, interventions, and, if applicable, trial acronym | 1                  |
| Trial registration                | 2a     | Trial identifier and registry name. If not yet registered, name of intended registry                         | 1                  |

|                            |    |                                                                                                                                                                                                                                                                                          |     |
|----------------------------|----|------------------------------------------------------------------------------------------------------------------------------------------------------------------------------------------------------------------------------------------------------------------------------------------|-----|
|                            | 2b | All items from the World Health Organization Trial Registration Data Set                                                                                                                                                                                                                 | N/A |
| Protocol version           | 3  | Date and version identifier                                                                                                                                                                                                                                                              | N/A |
| Funding                    | 4  | Sources and types of financial, material, and other support                                                                                                                                                                                                                              | 1   |
| Roles and responsibilities | 5a | Names, affiliations, and roles of protocol contributors                                                                                                                                                                                                                                  | 1   |
|                            | 5b | Name and contact information for the trial sponsor                                                                                                                                                                                                                                       | 1   |
|                            | 5c | Role of study sponsor and funders, if any, in study design; collection, management, analysis, and interpretation of data; writing of the report; and the decision to submit the report for publication, including whether they will have ultimate authority over any of these activities | N/A |

|                          |    |                                                                                                                                                                                                                                                                  |     |
|--------------------------|----|------------------------------------------------------------------------------------------------------------------------------------------------------------------------------------------------------------------------------------------------------------------|-----|
|                          | 5d | Composition, roles, and responsibilities of the coordinating centre, steering committee, endpoint adjudication committee, data management team, and other individuals or groups overseeing the trial, if applicable (see Item 21a for data monitoring committee) | N/A |
| <b>Introduction</b>      |    |                                                                                                                                                                                                                                                                  |     |
| Background and rationale | 6a | Description of research question and justification for undertaking the trial, including summary of relevant studies (published and unpublished) examining benefits and harms for each intervention                                                               | 4   |
|                          | 6b | Explanation for choice of comparators                                                                                                                                                                                                                            | 10  |
| Objectives               | 7  | Specific objectives or hypotheses                                                                                                                                                                                                                                | 5   |

|                                                           |    |                                                                                                                                                                                                           |   |
|-----------------------------------------------------------|----|-----------------------------------------------------------------------------------------------------------------------------------------------------------------------------------------------------------|---|
| Trial design                                              | 8  | Description of trial design including type of trial (eg, parallel group, crossover, factorial, single group), allocation ratio, and framework (eg, superiority, equivalence, noninferiority, exploratory) | 6 |
| <b>Methods: Participants, interventions, and outcomes</b> |    |                                                                                                                                                                                                           |   |
| Study setting                                             | 9  | Description of study settings (eg, community clinic, academic hospital) and list of countries where data will be collected. Reference to where list of study sites can be obtained                        | 6 |
| Eligibility criteria                                      | 10 | Inclusion and exclusion criteria for participants. If applicable, eligibility criteria for study centres and individuals who will perform the interventions (eg, surgeons, psychotherapists)              | 6 |

|               |     |                                                                                                                                                                                                |     |
|---------------|-----|------------------------------------------------------------------------------------------------------------------------------------------------------------------------------------------------|-----|
| Interventions | 11a | Interventions for each group with sufficient detail to allow replication, including how and when they will be administered                                                                     | 8   |
|               | 11b | Criteria for discontinuing or modifying allocated interventions for a given trial participant (eg, drug dose change in response to harms, participant request, or improving/worsening disease) | N/A |
|               | 11c | Strategies to improve adherence to intervention protocols, and any procedures for monitoring adherence (eg, drug tablet return, laboratory tests)                                              | 13  |
|               | 11d | Relevant concomitant care and interventions that are permitted or prohibited during the trial                                                                                                  | N/A |

1  
2  
3  
4  
5  
6  
7  
8  
9  
10  
11  
12  
13  
14  
15  
16  
17  
18  
19  
20  
21  
22  
23  
24  
25  
26  
27  
28  
29  
30  
31

|                      |    |                                                                                                                                                                                                                                                                                                                                                                                |    |
|----------------------|----|--------------------------------------------------------------------------------------------------------------------------------------------------------------------------------------------------------------------------------------------------------------------------------------------------------------------------------------------------------------------------------|----|
| Outcomes             | 12 | Primary, secondary, and other outcomes, including the specific measurement variable (eg, systolic blood pressure), analysis metric (eg, change from baseline, final value, time to event), method of aggregation (eg, median, proportion), and time point for each outcome. Explanation of the clinical relevance of chosen efficacy and harm outcomes is strongly recommended | 10 |
| Participant timeline | 13 | Time schedule of enrolment, interventions (including any run-ins and washouts), assessments, and visits for participants. A schematic diagram is highly recommended (see Figure)                                                                                                                                                                                               | 26 |
| Sample size          | 14 | Estimated number of participants needed to achieve study objectives and how it was determined, including clinical and statistical assumptions supporting any sample size calculations                                                                                                                                                                                          | 10 |

|    |                                                                     |     |                                                                                                                                                                                                                                                                                                                                                          |
|----|---------------------------------------------------------------------|-----|----------------------------------------------------------------------------------------------------------------------------------------------------------------------------------------------------------------------------------------------------------------------------------------------------------------------------------------------------------|
| 1  |                                                                     |     |                                                                                                                                                                                                                                                                                                                                                          |
| 2  |                                                                     |     |                                                                                                                                                                                                                                                                                                                                                          |
| 3  |                                                                     |     |                                                                                                                                                                                                                                                                                                                                                          |
| 4  | Recruitment                                                         | 15  | Strategies for achieving adequate participant enrolment to reach target sample size                                                                                                                                                                                                                                                                      |
| 5  |                                                                     |     |                                                                                                                                                                                                                                                                                                                                                          |
| 6  |                                                                     |     |                                                                                                                                                                                                                                                                                                                                                          |
| 7  | <b>Methods: Assignment of interventions (for controlled trials)</b> |     |                                                                                                                                                                                                                                                                                                                                                          |
| 8  |                                                                     |     |                                                                                                                                                                                                                                                                                                                                                          |
| 9  | Allocation:                                                         |     |                                                                                                                                                                                                                                                                                                                                                          |
| 10 |                                                                     |     |                                                                                                                                                                                                                                                                                                                                                          |
| 11 | Sequence generation                                                 | 16a | Method of generating the allocation sequence (eg, computer-generated random numbers), and list of any factors for stratification. To reduce predictability of a random sequence, details of any planned restriction (eg, blocking) should be provided in a separate document that is unavailable to those who enrol participants or assign interventions |
| 12 |                                                                     |     |                                                                                                                                                                                                                                                                                                                                                          |
| 13 |                                                                     |     |                                                                                                                                                                                                                                                                                                                                                          |
| 14 |                                                                     |     |                                                                                                                                                                                                                                                                                                                                                          |
| 15 |                                                                     |     |                                                                                                                                                                                                                                                                                                                                                          |
| 16 |                                                                     |     |                                                                                                                                                                                                                                                                                                                                                          |
| 17 |                                                                     |     |                                                                                                                                                                                                                                                                                                                                                          |
| 18 |                                                                     |     |                                                                                                                                                                                                                                                                                                                                                          |
| 19 |                                                                     |     |                                                                                                                                                                                                                                                                                                                                                          |
| 20 |                                                                     |     |                                                                                                                                                                                                                                                                                                                                                          |
| 21 |                                                                     |     |                                                                                                                                                                                                                                                                                                                                                          |
| 22 |                                                                     |     |                                                                                                                                                                                                                                                                                                                                                          |
| 23 |                                                                     |     |                                                                                                                                                                                                                                                                                                                                                          |
| 24 |                                                                     |     |                                                                                                                                                                                                                                                                                                                                                          |
| 25 |                                                                     |     |                                                                                                                                                                                                                                                                                                                                                          |
| 26 |                                                                     |     |                                                                                                                                                                                                                                                                                                                                                          |
| 27 |                                                                     |     |                                                                                                                                                                                                                                                                                                                                                          |
| 28 |                                                                     |     |                                                                                                                                                                                                                                                                                                                                                          |
| 29 |                                                                     |     |                                                                                                                                                                                                                                                                                                                                                          |
| 30 |                                                                     |     |                                                                                                                                                                                                                                                                                                                                                          |
| 31 |                                                                     |     |                                                                                                                                                                                                                                                                                                                                                          |



|                                                           |     |                                                                                                                                                                                                           |     |
|-----------------------------------------------------------|-----|-----------------------------------------------------------------------------------------------------------------------------------------------------------------------------------------------------------|-----|
| Allocation concealment mechanism                          | 16b | Mechanism of implementing the allocation sequence (eg, central telephone; sequentially numbered, opaque, sealed envelopes), describing any steps to conceal the sequence until interventions are assigned | 7   |
| Implementation                                            | 16c | Who will generate the allocation sequence, who will enrol participants, and who will assign participants to interventions                                                                                 | 7   |
| Blinding (masking)                                        | 17a | Who will be blinded after assignment to interventions (eg, trial participants, care providers, outcome assessors, data analysts), and how                                                                 | 7   |
|                                                           | 17b | If blinded, circumstances under which unblinding is permissible, and procedure for revealing a participant's allocated intervention during the trial                                                      | N/A |
| <b>Methods: Data collection, management, and analysis</b> |     |                                                                                                                                                                                                           |     |

|                         |     |                                                                                                                                                                                                                                                                                                                                                                                                              |    |
|-------------------------|-----|--------------------------------------------------------------------------------------------------------------------------------------------------------------------------------------------------------------------------------------------------------------------------------------------------------------------------------------------------------------------------------------------------------------|----|
| Data collection methods | 18a | Plans for assessment and collection of outcome, baseline, and other trial data, including any related processes to promote data quality (eg, duplicate measurements, training of assessors) and a description of study instruments (eg, questionnaires, laboratory tests) along with their reliability and validity, if known. Reference to where data collection forms can be found, if not in the protocol | 11 |
|                         | 18b | Plans to promote participant retention and complete follow-up, including list of any outcome data to be collected for participants who discontinue or deviate from intervention protocols                                                                                                                                                                                                                    | 12 |

|                                                 |                     |     |                                                                                                                                                                                                                                                                   |     |
|-------------------------------------------------|---------------------|-----|-------------------------------------------------------------------------------------------------------------------------------------------------------------------------------------------------------------------------------------------------------------------|-----|
| 1<br>2<br>3<br>4<br>5<br>6<br>7<br>8<br>9<br>10 | Data management     | 19  | Plans for data entry, coding, security, and storage, including any related processes to promote data quality (eg, double data entry; range checks for data values). Reference to where details of data management procedures can be found, if not in the protocol | 12  |
| 11<br>12<br>13<br>14<br>15<br>16                | Statistical methods | 20a | Statistical methods for analysing primary and secondary outcomes. Reference to where other details of the statistical analysis plan can be found, if not in the protocol                                                                                          | 13  |
| 17<br>18<br>19<br>20                            |                     | 20b | Methods for any additional analyses (eg, subgroup and adjusted analyses)                                                                                                                                                                                          | N/A |

1  
2  
3  
4  
5  
6  
7  
8  
9  
10  
11  
12  
13  
14  
15  
16  
17  
18  
19  
20  
21  
22  
23  
24  
25  
26  
27  
28  
29  
30  
31

|                            |     |                                                                                                                                                                                                                                                                                                                                       |     |
|----------------------------|-----|---------------------------------------------------------------------------------------------------------------------------------------------------------------------------------------------------------------------------------------------------------------------------------------------------------------------------------------|-----|
|                            | 20c | Definition of analysis population relating to protocol non-adherence (eg, as randomised analysis), and any statistical methods to handle missing data (eg, multiple imputation)                                                                                                                                                       | 16  |
| <b>Methods: Monitoring</b> |     |                                                                                                                                                                                                                                                                                                                                       |     |
| Data monitoring            | 21a | Composition of data monitoring committee (DMC); summary of its role and reporting structure; statement of whether it is independent from the sponsor and competing interests; and reference to where further details about its charter can be found, if not in the protocol. Alternatively, an explanation of why a DMC is not needed | N/A |

|                                 |     |                                                                                                                                                                                   |     |
|---------------------------------|-----|-----------------------------------------------------------------------------------------------------------------------------------------------------------------------------------|-----|
|                                 | 21b | Description of any interim analyses and stopping guidelines, including who will have access to these interim results and make the final decision to terminate the trial           | N/A |
| Harms                           | 22  | Plans for collecting, assessing, reporting, and managing solicited and spontaneously reported adverse events and other unintended effects of trial interventions or trial conduct | 13  |
| Auditing                        | 23  | Frequency and procedures for auditing trial conduct, if any, and whether the process will be independent from investigators and the sponsor                                       | N/A |
| <b>Ethics and dissemination</b> |     |                                                                                                                                                                                   |     |
| Research ethics approval        | 24  | Plans for seeking research ethics committee/institutional review board (REC/IRB) approval                                                                                         | 16  |

|                     |     |                                                                                                                                                                                                                                  |       |
|---------------------|-----|----------------------------------------------------------------------------------------------------------------------------------------------------------------------------------------------------------------------------------|-------|
| Protocol amendments | 25  | Plans for communicating important protocol modifications (eg, changes to eligibility criteria, outcomes, analyses) to relevant parties (eg, investigators, REC/IRBs, trial participants, trial registries, journals, regulators) | 16-17 |
| Consent or assent   | 26a | Who will obtain informed consent or assent from potential trial participants or authorised surrogates, and how (see Item 32)                                                                                                     | 17    |
|                     | 26b | Additional consent provisions for collection and use of participant data and biological specimens in ancillary studies, if applicable                                                                                            | N/A   |
| Confidentiality     | 27  | How personal information about potential and enrolled participants will be collected, shared, and maintained in order to protect confidentiality before, during, and after the trial                                             | 17    |

|                               |     |                                                                                                                                                                                                                                                                                     |     |
|-------------------------------|-----|-------------------------------------------------------------------------------------------------------------------------------------------------------------------------------------------------------------------------------------------------------------------------------------|-----|
| Declaration of interests      | 28  | Financial and other competing interests for principal investigators for the overall trial and each study site                                                                                                                                                                       | 1   |
| Access to data                | 29  | Statement of who will have access to the final trial dataset, and disclosure of contractual agreements that limit such access for investigators                                                                                                                                     | 17  |
| Ancillary and post-trial care | 30  | Provisions, if any, for ancillary and post-trial care, and for compensation to those who suffer harm from trial participation                                                                                                                                                       | N/A |
| Dissemination policy          | 31a | Plans for investigators and sponsor to communicate trial results to participants, healthcare professionals, the public, and other relevant groups (eg, via publication, reporting in results databases, or other data sharing arrangements), including any publication restrictions | 17  |

|                            |     |                                                                                                                                                                                                |     |
|----------------------------|-----|------------------------------------------------------------------------------------------------------------------------------------------------------------------------------------------------|-----|
|                            | 31b | Authorship eligibility guidelines and any intended use of professional writers                                                                                                                 | N/A |
|                            | 31c | Plans, if any, for granting public access to the full protocol, participant-level dataset, and statistical code                                                                                | N/A |
| <b>Appendices</b>          |     |                                                                                                                                                                                                |     |
| Informed consent materials | 32  | Model consent form and other related documentation given to participants and authorised surrogates                                                                                             | N/A |
| Biological specimens       | 33  | Plans for collection, laboratory evaluation, and storage of biological specimens for genetic or molecular analysis in the current trial and for future use in ancillary studies, if applicable | N/A |

\*It is strongly recommended that this checklist be read in conjunction with the SPIRIT 2013 Explanation & Elaboration for important clarification on the items. Amendments to the protocol



1  
2  
3 should be tracked and dated. The SPIRIT checklist is copyrighted by the SPIRIT Group under the  
4 Creative Commons "[Attribution-NonCommercial-NoDerivs 3.0 Unported](#)" license.  
5  
6  
7  
8  
9  
10  
11  
12  
13  
14  
15  
16  
17  
18  
19  
20  
21  
22  
23  
24  
25  
26  
27  
28  
29  
30  
31
